# Supplementary material for: A CO2 utilization framework for liquid fuels and chemical production: techno-economic and environmental analysis
Source: Royal Society of Chemistry journal article supplement (doi:10.1039/d1ee01444g), 2021-11-27
Supplement: d1ee01444g1.pdf [file d1ee01444g1.pdf]

**Electronic Supplementary Information:**

**CO<sub>2</sub> utilization framework for liquid fuels and chemicals: Techno-economic  
and environmental analysis**

*Thai Ngan Do\**, *Chanhee You\**, and *Jiyong Kim<sup>1</sup>*

School of Chemical Engineering, Sungkyungwan University, 16419, Republic of Korea

---

<sup>1</sup> Corresponding Author: E-mail address: [jiyongkim@skku.edu](mailto:jiyongkim@skku.edu) (J. Kim).

\* Authors contributed equally to the manuscript

## S1. Potential of CO<sub>2</sub> utilization for energy-based product (CCU4E)

**Table S1.1.** The current and potential of supply and demand of CO<sub>2</sub>

|         | Supply                                        | Mtpa                            | Demand*                       | Mtpa     |
|---------|-----------------------------------------------|---------------------------------|-------------------------------|----------|
| Current | Natural geological CO <sub>2</sub> reservoirs | 55                              | EOR                           | 80       |
|         | Industrial by-products                        | 55                              | Food industry                 | 7        |
|         |                                               |                                 | Beverage carbonation          | 7        |
|         |                                               |                                 | Fabrication of metal          | 5        |
|         |                                               |                                 | Other applications            | 10       |
| Future  | Current supply (2019)                         | 110                             | Growth of existing demand     | 200      |
|         | Growth of existing supply to (2030)           | 90                              | EGS                           | 5 – 30   |
|         | Bulk CO <sub>2</sub> (low cost)               | 500                             | ECBM                          | 30 – 300 |
|         | Bulk CO <sub>2</sub> (medium cost)            | 2,000                           | EOR & EGR                     | 30 – 300 |
|         | Bulk CO <sub>2</sub> (high cost)              | 18,000                          | Polymer processing            | 5 – 30   |
|         |                                               |                                 | Bauxite treatment             | 5 – 30   |
|         |                                               |                                 | Carbonate aggregates          | 30 – 300 |
|         |                                               |                                 | CO <sub>2</sub> cement curing | 60 – 600 |
|         |                                               | Surplus to energy-based product | >910                          |          |

\* The estimation do not consider the use of CO<sub>2</sub> in the urea manufacturing <sup>1</sup>.

The potential supply and future demand for CO<sub>2</sub> production are not readily available, which is provided of the order of magnitude, as reviewed by Global CCS Institute [1] and where else <sup>2,3</sup>. The global consumption of CO<sub>2</sub> is currently estimated to be 110 Mtpa (2020) in which the large volume of CO<sub>2</sub> onsite-generated and directly consumed in urea manufacturing is excluded <sup>2</sup>. About 80 Mtpa CO<sub>2</sub> is consumed for enhanced oil recovery (EOR) whereas the remain is supplied for the food and beverage industry, fabrication of metal, and others.

Since a small portion of CO<sub>2</sub> has been industrially utilized, the huge potential emission sources at the different concentrated levels corresponded to the CO<sub>2</sub> captured cost was reported by IPCC <sup>4</sup>. The potential supply of CO<sub>2</sub> from large point sources is estimated at 500 Mtpa of low-cost of high-concentrated CO<sub>2</sub>, 2,000 Mtpa of medium cost, and 18,000 Mtpa of high-cost of CO<sub>2</sub> <sup>1</sup>. With the consideration of using only the low- and medium-cost of captured CO<sub>2</sub>, there is still very large unbalance between CO<sub>2</sub> demand and supply. The current use of CO<sub>2</sub> is estimated to 2030 at roughly 200 Mtpa <sup>2</sup>. Several existed and emerging technology have been considered for the large potential use of CO<sub>2</sub> as sequestered underground or utilized for materials, chemicals, and fuels. Eventually, the high scenarios of the use of CO<sub>2</sub> for sequestration and CO<sub>2</sub>-based materials were estimated, there is still a large surplus of CO<sub>2</sub> for chemical and fuel that have vast demand. That has driven effort to develop technology of CO<sub>2</sub> utilization into chemical and fuel production that have vast demand. The potential fuel production of CO<sub>2</sub> utilization was reviewed and estimated based on the current market size considered the annual growth rate to 2030 <sup>5</sup>.

While a number of fuels and chemicals can be produced through different technological combinations, we selected eight different products and representative 72 pathways based on several considerations such as commercialization, fully accessible information, technology maturity, especially potential market size of these products in future. The potential market size of CO<sub>2</sub>-based fuels was estimated followed the methodology of Reference <sup>5</sup>, and presented in Table S1.2.

**Table S1.2.** The potential market size of liquid fuels from CO<sub>2</sub> utilization

| Product              | Potential production of CO <sub>2</sub> utilization in 2030 (Mt/y) |
|----------------------|--------------------------------------------------------------------|
| Methanol             | 204 <sup>a</sup>                                                   |
| Ethanol              | 163 <sup>b</sup>                                                   |
| Olefin               | 7 <sup>c</sup>                                                     |
| Gasoline             | 2154 <sup>d</sup> (to Infinite)                                    |
| Fischer-Tropsch fuel | 163 <sup>e</sup>                                                   |
| Bio-diesel           | 176 <sup>f</sup>                                                   |
| Dimethyl ether       | 41 <sup>e</sup>                                                    |
| Formic acid          | 10 <sup>g</sup>                                                    |

<sup>a</sup> Estimated in high scenario for methanol as a chemical feedstock and fuel, based on Ref <sup>5</sup>

<sup>b</sup> The annual growth of ethanol is assumed at 6%, and 85% of market share in 2030 <sup>5,6</sup>

<sup>c</sup> Estimated in high scenario for olefin (mainly ethylene and propylene), based on Ref <sup>5</sup>

<sup>d</sup> Estimated based on global oil demand (105.4 million barrel per day in 2030) <sup>7</sup>

<sup>e</sup> Estimated in high scenario based on Ref [7]

<sup>f</sup> Estimated from 115 Mt in 2018 with the growth of 3.6% per year <sup>8</sup>

<sup>g</sup> Taken from Ref <sup>9</sup>

## S2. Process simulation and modeling

### S2.1. Simulation of each technology

Based on the generated superstructure, summarized in Fig. S2.1, the unit technologies were firstly simulated using Aspen Plus software, subsequent full CO<sub>2</sub>-to-fuel pathways. Here, each technology consists of various equipment for its operation purpose (e.g., reaction kinetic expressions, temperature, pressure, etc.) that was detailed described in Table S2.1.

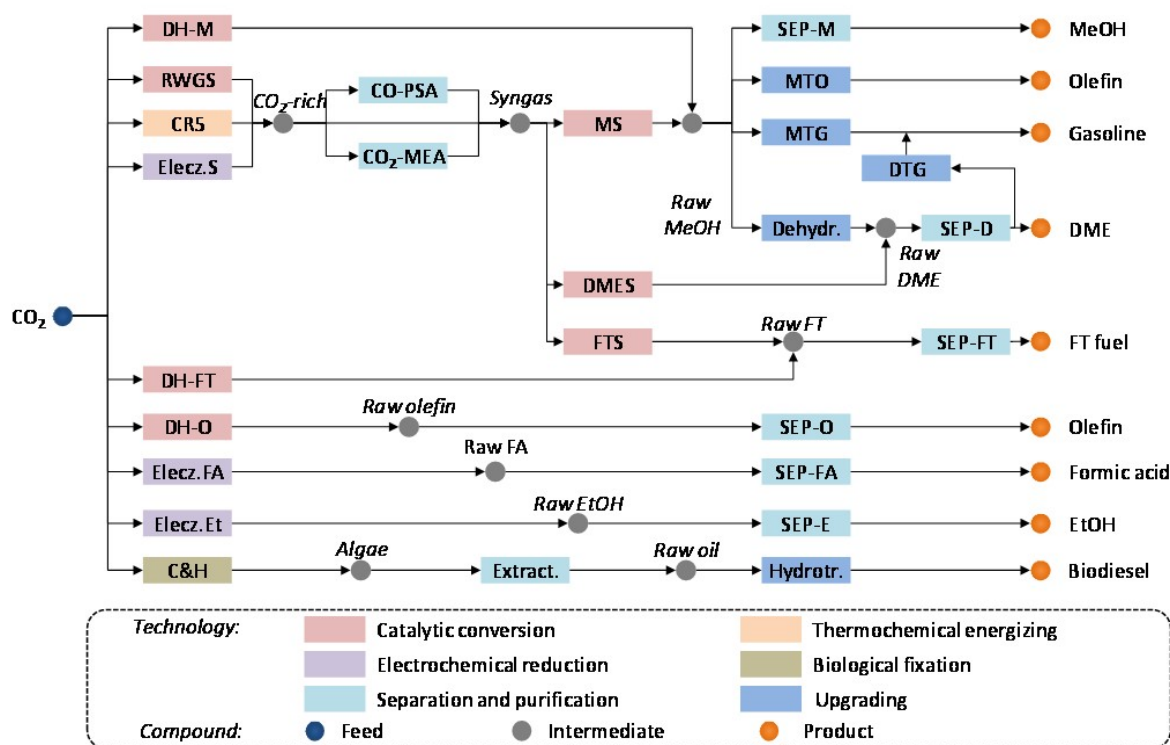

**Fig. S2.1.** The CCU4E superstructure. Abbreviation: RWGS: Reverse water-gas shift, DH-M: Direct hydrogenation to methanol, DH-FT: Direct hydrogenation to Fischer-Tropsch, DH-O: Direct hydrogenation to olefin, CR5: Counter-Rotating-Ring/Receiver/Reactor/Recuperator, Elec.z.S: Electrochemical reduction to syngas, Elec.z.FA: Electrochemical reduction to formic acid, Elec.z.EtOH: Electrochemical reduction to ethanol, MS: Methanol synthesis, FTS: Fischer-Tropsch synthesis, DMES: Dimethyl ether synthesis, C&H: cultivation and harvesting, Extract.: Oil extraction, Hydrotr.: Hydrotreating, Dehydro.: Dehydration, MTO: methanol-to-olefin, MTG: Methanol-to-gasoline, DTG: dimethyl ether-to-gasoline, CO-PSA: CO Pressure Swing Adsorption, CO<sub>2</sub>-MEA: CO<sub>2</sub> Absorption by monoethanolamine, SEP-M, SEP-D, SEP-FT, SEP-O, SEP FA, SEP-E: Separation and purification for methanol, dimethyl ether, FT fuel, olefin, formic acid, ethanol.

**Table S2.1.** Unit process specification and parameters for simulation

| Process                         | Simplified PFD | Operating conditions |         |                                                                                                                                                                                                                                                                                                                                                                                                                                                                                                                                                                 |
|---------------------------------|----------------|----------------------|---------|-----------------------------------------------------------------------------------------------------------------------------------------------------------------------------------------------------------------------------------------------------------------------------------------------------------------------------------------------------------------------------------------------------------------------------------------------------------------------------------------------------------------------------------------------------------------|
|                                 |                | T (°C)               | P (bar) | Description                                                                                                                                                                                                                                                                                                                                                                                                                                                                                                                                                     |
| Reverse water gas shift (RWGS)  |                | 400-1,200            | 1-20    | $r_1 = \frac{k_2 P_{CO_2} (1 - P_{H_2O} P_{CO} / k_{e,2} P_{H_2} P_{CO_2})}{(1 + K_1 P_{H_2}^{0.5} + K_2 P_{H_2O} + K_3 P_{H_2O} / P_{H_2})} \quad 10,11$                                                                                                                                                                                                                                                                                                                                                                                                       |
| Methanol synthesis (MS)         |                | 150-300              | 50-75   | $r_2 = \frac{k_2 P_{CO_2} (1 - P_{H_2O} P_{CO} / k_{e,2} P_{H_2} P_{CO_2})}{(1 + K_1 P_{H_2}^{0.5} + K_2 P_{H_2O} + K_3 P_{H_2O} / P_{H_2})}, r_3 = \frac{k_1 P_{CO_2} P_{H_2} (1 - P_{H_2O} P_{MeOH} / k_{e,1} P_{H_2}^3 P_{CO_2})}{(1 + K_1 P_{H_2}^{0.5} + K_2 P_{H_2O} + K_3 P_{H_2O} / P_{H_2})^3} \quad 10$                                                                                                                                                                                                                                               |
| Fischer-Tropsch synthesis (FTS) |                | 200-250              | 25-60   | $r_1 = \frac{ae^{-b/RT} K_7^{0.5} P_{H_2}^d}{(1 + K_7^{0.5} (2 + 1 / K_4) P_{H_2}^{0.5} + \frac{K_7^{0.5}}{K_3 P_4 P_{H_2}^{-0.5}} + \frac{K_7^{0.5} P_{H_2O}}{K_2 K_3 K_4 P_{H_2}^{1.5}})} \quad 12$                                                                                                                                                                                                                                                                                                                                                           |
| Dimethyl ether synthesis (DMES) |                | 200-400              | 20-60   | $r_1 = \frac{k_1 f_{CO} f_{H_2}^2 [1 - f_{MeOH} / (K_1 f_{CO} f_{H_2}^2)]}{(1 + K_{CO} f_{CO} + K_{CO_2} f_{CO_2} + K_{H_2} f_{H_2})^3}, r_2 = \frac{k_2 f_{CO_2} f_{H_2}^3 [1 - f_{MeOH} f_{H_2O} / (K_2 f_{CO_2} f_{H_2}^3)]}{(1 + K_{CO} f_{CO} + K_{CO_2} f_{CO_2} + K_{H_2} f_{H_2})^4}$<br>$r_3 = \frac{k_3 f_{H_2O} [1 - f_{CO_2} f_{H_2} / (K_3 f_{CO} f_{H_2O})]}{1 + K_{CO} f_{CO} + K_{CO_2} f_{CO_2} + \sqrt{K_{H_2} f_{H_2}}}, r_4 = \frac{k_4 f_{MeOH} [1 - f_{DME} f_{H_2O} / (K_4 f_{MeOH}^2)]}{(1 + \sqrt{K_{MeOH} f_{MeOH}})^2}, \quad 13,14$ |

|                                                         |  |         |       |                                                                                                                                                                                                                                                                                                                                                                                                                                                                                                                                                                                     |
|---------------------------------------------------------|--|---------|-------|-------------------------------------------------------------------------------------------------------------------------------------------------------------------------------------------------------------------------------------------------------------------------------------------------------------------------------------------------------------------------------------------------------------------------------------------------------------------------------------------------------------------------------------------------------------------------------------|
| Direct CO <sub>2</sub> hydrogenation to methanol (DH-M) |  | 250-350 | 35-55 | $r_1 = k_1 \left( K_{CO} f_{CO} f_{H_2}^{1.5} - \frac{K_{CO}}{K_A} f_{CH_3OH} f_{H_2}^{-0.5} \right) / ABS,$ $r_2 = k_2 \left( K_{CO_2} f_{CO_2} f_{H_2} - \frac{K_{CO_2}}{K_B} f_{H_2O} f_{CO} \right) / ABS,$ $r_3 = k_3 \left( K_{CO_2} f_{CO_2} f_{H_2}^{1.5} - \frac{K_{CO_2}}{K_C} f_{H_2O} f_{CH_3OH} f_{H_2}^{-1.5} \right) / ABS,$ $ABS = f_{H_2}^{0.5} + \frac{K_{H_2O}}{K_H^{0.5}} f_{H_2O} + K_{CO} f_{CO} f_{H_2}^{0.5} + \frac{K_{CO} K_{H_2O}}{K_H^{0.5}} f_{CO} f_{H_2O} + K_{CO_2} f_{CO_2} f_{H_2}^{0.5} + \frac{K_{CO_2} K_{H_2O}}{K_H^{0.5}} f_{CO_2} f_{H_2O}$ |
| Direct CO <sub>2</sub> hydrogenation to FT fuel (DH-FT) |  | 300     | 25    | <p>The FT synthesis considered hydrogenation of both CO<sub>2</sub> and CO, followed by reference <sup>16</sup>:</p> $nCO_2 + 3nH_2 \rightarrow -(CH_2)_n + 2nH_2O,$ $nCO + 2nH_2 \rightarrow -(CH_2)_n + nH_2O$                                                                                                                                                                                                                                                                                                                                                                    |
| Direct CO <sub>2</sub> hydrogenation to olefin (DH-O)   |  | 290-360 | 10    | $r_1 = k_1 \frac{P_{CO_2} P_{H_2} - P_{CO} P_{H_2O} / K_{eq}}{P_{CO} + a_1 P_{H_2O} + b_1 P_{CO_2}}, \quad r_i = k_i \frac{P_{CO} P_{H_2}}{P_{CO} + a_i P_{H_2O} + b_i P_{CO_2}},$                                                                                                                                                                                                                                                                                                                                                                                                  |
| Dehydration of methanol to DME (Dehydr)                 |  | 250-400 | 2-20  | $r = \frac{k_s K_{MeOH}^2 (C_{MeOH}^2 + C_{water} C_{DME} / K_{eq})}{(1 + 2\sqrt{K_{MeOH} C_{MeOH}} + K_{water} C_{water})^4},$                                                                                                                                                                                                                                                                                                                                                                                                                                                     |
| Methanol-to-olefin (MTO)                                |  | 490     | 2.2   | <p>The black box model was adopted for the reactor.<br/>Mass balance and energy balance was followed by reference <sup>19</sup>.</p> $nCH_3OH \rightarrow C_n H_{2n} + nH_2O, \quad n = 2, 3, 4$                                                                                                                                                                                                                                                                                                                                                                                    |

|                                                          |                                                                                     |         |         |                                                                                                                                                                                                                                                                                                                                                                                                                                                                                                                                                                                                                                                                                                                                                                                                                                                                                   |
|----------------------------------------------------------|-------------------------------------------------------------------------------------|---------|---------|-----------------------------------------------------------------------------------------------------------------------------------------------------------------------------------------------------------------------------------------------------------------------------------------------------------------------------------------------------------------------------------------------------------------------------------------------------------------------------------------------------------------------------------------------------------------------------------------------------------------------------------------------------------------------------------------------------------------------------------------------------------------------------------------------------------------------------------------------------------------------------------|
| Methanol-to-gasoline (MTG)                               | 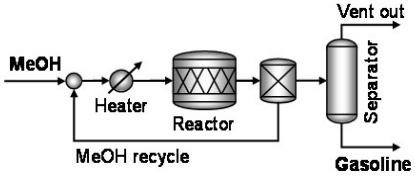   | 300-400 | 10-20   | <p>The black box model was adopted for the reactor.</p> <p>Mass balance and energy balance was followed by reference <sup>20,21</sup></p> $\frac{n}{2} [2\text{CH}_3\text{OH} \Leftrightarrow \text{CH}_3\text{OCH}_3 + \text{H}_2\text{O}] \rightarrow \text{C}_n\text{H}_{2n} + n\text{H}_2\text{O} \rightarrow n[\text{C}_n\text{H}_{2n}] + n\text{H}_2\text{O}$                                                                                                                                                                                                                                                                                                                                                                                                                                                                                                               |
| Dimethyl ether-to gasoline (DTG)                         |    | 200-400 | 20-60   | $r_1 = \frac{k_1 f_{\text{CO}} f_{\text{H}_2}^2 [1 - f_{\text{MeOH}} / (K_1 f_{\text{CO}} f_{\text{H}_2}^2)]}{(1 + K_{\text{CO}} f_{\text{CO}} + K_{\text{CO}_2} f_{\text{CO}_2} + K_{\text{H}_2} f_{\text{H}_2})^3}, r_2 = \frac{k_2 f_{\text{CO}_2} f_{\text{H}_2}^3 [1 - f_{\text{MeOH}} f_{\text{H}_2\text{O}} / (K_2 f_{\text{CO}_2} f_{\text{H}_2}^3)]}{(1 + K_{\text{CO}} f_{\text{CO}} + K_{\text{CO}_2} f_{\text{CO}_2} + K_{\text{H}_2} f_{\text{H}_2})^4},$ $r_3 = \frac{k_3 f_{\text{H}_2\text{O}} [1 - f_{\text{CO}_2} f_{\text{H}_2} / (K_3 f_{\text{CO}} f_{\text{H}_2\text{O}})]}{1 + K_{\text{CO}} f_{\text{CO}} + K_{\text{CO}_2} f_{\text{CO}_2} + \sqrt{K_{\text{H}_2} f_{\text{H}_2}}}, r_4 = \frac{k_4 f_{\text{MeOH}} [1 - f_{\text{DME}} f_{\text{H}_2\text{O}} / (K_4 f_{\text{MeOH}}^2)]}{(1 + \sqrt{K_{\text{MeOH}} f_{\text{MeOH}}})^2}, \quad 22-24$ |
| Counter-Rotating-Ring Receiver/Reactor/Recuperator (CR5) |    | ~1500   | -       | <p>Collecting solar energy and converting CO<sub>2</sub> into CO. <sup>25,26</sup></p> <p>Containing reactive materials such as YSZ-supported iron oxide or ceria</p> <p>Energy transfer efficiency from solar to chemical (stored in CO): 20%</p> <p>Efficiency of CO<sub>2</sub> to CO: 25%</p>                                                                                                                                                                                                                                                                                                                                                                                                                                                                                                                                                                                 |
| Electrolyzer for CO <sub>2</sub> reduction (Elec.)       |   | -       | 1-30    | <p>Requiring significant energy input.</p> <p>Containing heterogeneous electrocatalysts for specific products (i.e., Ag for CO, Cu or Ag for ethanol, Sn for formic acid. <sup>27-29</sup></p>                                                                                                                                                                                                                                                                                                                                                                                                                                                                                                                                                                                                                                                                                    |
| Cultivation and Harvesting of Microalgae (C&H)           |  | Ambient | Ambient | <p>Algae growth in open pond system or closed photobioreactor (PBR) <sup>30,31</sup>.</p> $[a]\text{CO}_2 + [b]\text{nutrients} + \text{sunlight} \rightarrow [c]\text{O}_2 + \text{biomass}$                                                                                                                                                                                                                                                                                                                                                                                                                                                                                                                                                                                                                                                                                     |

|                                                                       |                                                                                     |        |      |                                                                                                                                                                                                                |
|-----------------------------------------------------------------------|-------------------------------------------------------------------------------------|--------|------|----------------------------------------------------------------------------------------------------------------------------------------------------------------------------------------------------------------|
| Lipid extraction<br>(Extract.)                                        | 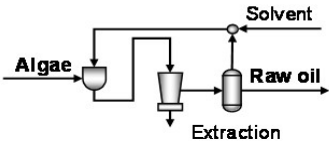   | -      | -    | Lipid extraction was assumed at 90% efficiency <sup>30</sup> .<br>Oil/solvent phase was separated from water and biomass. Then, solvent was separated in stripper and recycled. The lipid was at 99.5% purity. |
| Hydrotreating for oil upgrading<br>(Hydrotr.)                         |    | 350    | 35   | Hydrogen consumption 1.5%wt of feed <sup>30</sup>                                                                                                                                                              |
| CO Pressure Swing Adsorption (CO-PSA)                                 |    | 60     | 9    | CO-PSA yield at 90%. Operating up to at 9 bar <sup>32</sup><br>Adsorbent: Cu-Cu <sup>+</sup> /θ-Al <sub>2</sub> O <sub>3</sub><br>Adsorbent rate: 16.4 ton/ton of feed. Adsorbent lifetime of 2 years.         |
| H <sub>2</sub> Pressure Swing Adsorption (H <sub>2</sub> -PSA)        |   | 30-35  | 15   | H <sub>2</sub> PSA yield at 90%. Operating up to at 15 bar. <sup>17,33</sup><br>Adsorbent: zeolite 5A.<br>Adsorbent requirement: 0.01 kmol/kg of feed.                                                         |
| CO <sub>2</sub> Absorption by monoethanolamine (CO <sub>2</sub> -MEA) |  | 25-120 | 1-15 | CO <sub>2</sub> -MEA for 90% of CO <sub>2</sub> recovery <sup>17,34,35</sup><br>Monoethanolamine(MEA): 23%                                                                                                     |



*Reverse water-gas shift (RWGS)*: converts CO<sub>2</sub> and H<sub>2</sub> into CO and H<sub>2</sub>O, using Cu/ZnO/Al<sub>2</sub>O<sub>3</sub> catalyst in this study<sup>10,11</sup>. CO<sub>2</sub> and H<sub>2</sub> were mixed, heated, and compressed before entering into plug flow reactor (RPlug model). Since RWGS is equilibrium reaction, mixture gas of three components CO, CO<sub>2</sub>, and H<sub>2</sub> required further gas component separation (e.g., CO<sub>2</sub> absorption) or mixed with outsourcing H<sub>2</sub> for optimal stoichiometric number,  $SN=(H_2+CO_2)/(CO_2+CO)$ , for specific further synthesis (e.g., methanol synthesis, Fischer-Tropsch synthesis, or dimethyl ether synthesis). The simplified process flow diagram and kinetic expression are presented in Table S2.1 – S2.2.

*Methanol synthesis*: MeOH is produced from syngas (mixture of CO and H<sub>2</sub>). In methanol synthesis unit, feed gas was first mixed with the recycle gas from downstream, before pressed up and heated to reaction condition. The RPlug model was used for plug flow reactor, that operated at 150 °C, 50 bar and filled by Cu/ZnO/Al<sub>2</sub>O<sub>3</sub> catalyst<sup>25,36</sup>. In methanol synthesis unit, SN at 2 was preferred for optimal methanol yield. The kinetic expression and parameters are described in Table S2.1 – S2.2. Cooler and simple flash tank were operated right after reactor to separate liquid of methanol/water from unreacted gas that was further recycled back to reactor. The methanol/water liquid was brought into distillation column for purifying methanol from water.

**Table S2.2.** Kinetics and adsorption parameters for MS and RWGS reactions<sup>10</sup>

| Parameters | Value                                                      |
|------------|------------------------------------------------------------|
| $k_1$      | $1.07 \exp(36,696 \text{ kJkmol}^{-1}/RT)$                 |
| $k_2$      | $1.22 \exp(-94,765 \text{ kJkmol}^{-1}/RT)$                |
| $K_{e,1}$  | $10^{(3,066/T - 10.592)}$                                  |
| $K_{e,2}$  | $10^{(-2073/T + 2.029)}$                                   |
|            | $6.62 \cdot 10^{-11} \exp(124,119 \text{ kJkmol}^{-1}/RT)$ |
|            | 3,453.38                                                   |

*Fischer-Tropsch synthesis (FTS)*: is the most common technology to produces liquid hydrocarbon (e.g., gasoline, diesel, and aviation fuels) from synthetic gas. Firstly, syngas was mixed with recycle stream (unreacted syngas), then pressed up and heated up to 38 bar and 210 °C before fed into reactor. The reaction mechanism was assumed by a series of reaction steps as shown in Eqs. (1) – (7)<sup>12</sup>. The kinetic expression and parameters are described in Table S2.1 and S2.3. The reactor outlet were brought to the separator unit, in which main hydrocarbon

products (i.e., FT fuels) flow out from the bottom while the light hydrocarbon gas, and unreacted gases are merged with steam and reformed before recycle <sup>12</sup>.

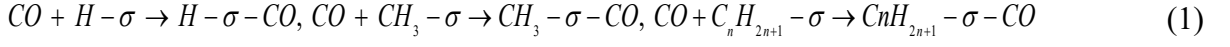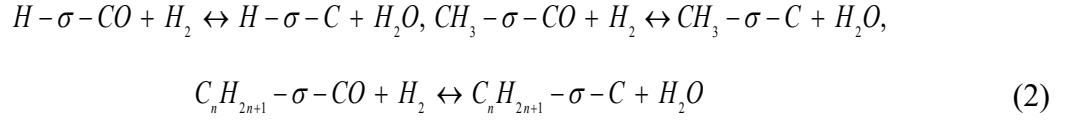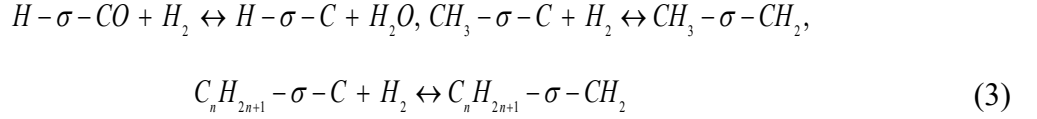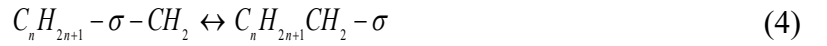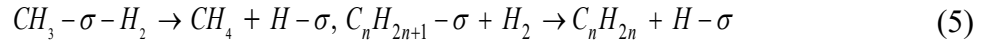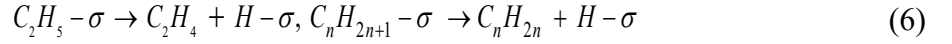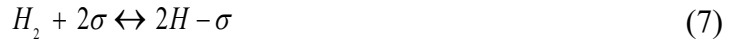

**Table S2.3.** Kinetics and adsorption parameters for FT reactions <sup>12</sup>

| Parameters      | Value                   | Unit                          | Parameters      | Value                   | Unit                      |
|-----------------|-------------------------|-------------------------------|-----------------|-------------------------|---------------------------|
| A <sub>1</sub>  | 1.83 x 10 <sup>9</sup>  | kmol/kg <sub>cat</sub> ·h·bar | E <sub>1</sub>  | 1.00 x 10 <sup>5</sup>  | kJ/kmol                   |
| A <sub>2</sub>  | 5.08                    | -                             | ΔH <sub>2</sub> | 8.68 x 10 <sup>3</sup>  | kJ/kmol                   |
| A <sub>3</sub>  | 2.44                    | 1/bar                         | ΔH <sub>3</sub> | 9.44 x 10 <sup>3</sup>  | kJ/kmol                   |
| A <sub>4</sub>  | 2.90                    | -                             | ΔH <sub>4</sub> | 7.90 x 10 <sup>3</sup>  | kJ/kmol                   |
| A <sub>5</sub>  | 4.49 x 10 <sup>4</sup>  | kmol/kg <sub>cat</sub> ·h·bar | E <sub>5</sub>  | 7.24 x 10 <sup>4</sup>  | kJ/kmol                   |
| A <sub>5M</sub> | 8.43 x 10 <sup>4</sup>  | kmol/kg <sub>cat</sub> ·h·bar | E <sub>5M</sub> | 6.30 x 10 <sup>4</sup>  | kJ/kmol                   |
| A <sub>6</sub>  | 7.47 x 10 <sup>8</sup>  | kmol/kg <sub>cat</sub> ·h·bar |                 | 9.72 x 10 <sup>4</sup>  | kJ/kmol                   |
| A <sub>6E</sub> | 7.03 x 10 <sup>8</sup>  | kmol/kg <sub>cat</sub> ·h     |                 | 1.09 x 10 <sup>5</sup>  | kJ/kmol                   |
| A <sub>7</sub>  | 1.00 x 10 <sup>-4</sup> | 1/bar                         | ΔH <sub>7</sub> | -2.50 x 10 <sup>5</sup> | kJ/kmol                   |
|                 |                         |                               | ΔE              | 1.12 x 10 <sup>3</sup>  | kJ/kmol(CH <sub>2</sub> ) |

*Dimethyl ether synthesis (DMES)*: produces DME from syngas which is preferred CO/H<sub>2</sub> ratio at 1. Mixture feed gas was pressed up, and heated to 260 °C, 50 bar before fed in reactor filled catalyst of Cu/ZnO/Al<sub>2</sub>O<sub>3</sub> and γ-Al<sub>2</sub>O<sub>3</sub> <sup>13</sup>. The outlet stream was brought into separation unit to separate DME from others (e.g., CO<sub>2</sub>, MeOH), and recycle unreacted H<sub>2</sub>/CO. In separation, chemical absorption using methanol for CO<sub>2</sub> absorption that results in liquid of DME/MeOH/CO<sub>2</sub>-rich solvent, and mixture of H<sub>2</sub>, CO (for recycling). The liquid stream then entered to two distillation columns for separating DME from CO<sub>2</sub>, and MeOH solvent, respectively. The simplified process flow diagram, kinetic expressions, and parameters for DMES are described in Table S2.1 and S2.4. Here, Rplug model was used for DMES reactor.

**Table S2.4.** Kinetics and parameters for dimethyl ether synthesis (DMES) <sup>13</sup>

| Parameters | Value                                  |
|------------|----------------------------------------|
| $k_1$      | $7,380 \exp(-54,307/RT)$               |
| $k_2$      | $5,059 \exp(-67,515/RT)$               |
| $k_3$      | $1,062 \exp(-43,473/RT)$               |
| $k_4$      | $7.3976 \exp(-20,436/RT)$              |
| $K_{CO}$   | $3.934 \times 10^{-6} \exp(37,373/RT)$ |
| $K_{CO_2}$ | $1.585 \times 10^{-6} \exp(53,795/RT)$ |
| $K_{H_2}$  | $0.6716 \exp(-6,476/RT)$               |
| $K_{MeOH}$ | $3.480 \times 10^{-6} \exp(54,689/RT)$ |

*Direct CO<sub>2</sub> hydrogenation to MeOH (DH-M):* directly synthesizes MeOH from CO<sub>2</sub> and H<sub>2</sub> in a single conversion pot, in which the two-step process of RWGS to CO and subsequent CO hydrogenation is proceeded. Firstly, CO<sub>2</sub> and H<sub>2</sub> was mixed with recycling, then pressed up and heated to 50 bar and 250 °C. Plug flow reactor was modeled using RPlug, in which kinetic expression for the catalyst of fibrous Cu/Zn/Al/Zr was embed as followed Table S2.1 and S2.5. <sup>15,37</sup>. Then, flash tank was operated for separating MeOH/water liquid, leaving gas of CO<sub>2</sub>, CO, H<sub>2</sub> for recycling. Finally, MeOH was separated and purified in distillation column.

**Table S2.5.** Kinetics and adsorption parameters for direct CO<sub>2</sub> hydrogenation to MeOH <sup>15,37</sup>

| Parameters           | Value                                      |                  |
|----------------------|--------------------------------------------|------------------|
| $k_1$                | $4.0638 \times 10^{-6} \exp(-11,695/RT)$   | kmol/kg.s.Pa     |
| $k_2$                | $2.3714 \times 10^{-23} \exp(-112,860/RT)$ | kmol/kg.s.Pa     |
| $K_B$                | $281.1780 \times \exp(-43,939/RT)$         | -                |
| $K_C$                | $6.6687 \times 10^{-21} \exp(54,499/RT)$   | Pa <sup>-2</sup> |
| $K_{CO}$             | $8.3965 \times 10^{-11} \exp(118,270/RT)$  | Pa <sup>-1</sup> |
| $K_{CO_2}$           | $1.7214 \times 10^{-10} \exp(81,287/RT)$   | Pa <sup>-1</sup> |
| $K_{H_2O}/K_H^{0.5}$ | $4.3676 \times 10^{-12} \exp(956,775/RT)$  | -                |

*Direct CO<sub>2</sub> hydrogenation to FT fuel (DH-FT):* Similarly to DH-M, the two-step process of RWGS to CO and subsequent CO hydrogenation is proceeded in one reactor. CO<sub>2</sub> and H<sub>2</sub> was first mixed with recycling, then pressed up and heated to 25 bar and 300 °C. DH-FT reactor contains Fe-based catalyst (here, Rstoic reactor model was used) that promotes reactions as shown in Eqs. (8) – (16) <sup>16</sup>. The following separation stage is similar to that of FTS. The main product of FT fuels was separated and purified from water, light gas and unreacted gas. The gas from the top of column was further treated in reforming unit that convert by-product C<sub>1</sub>-C<sub>4</sub> into syngas for recycling.

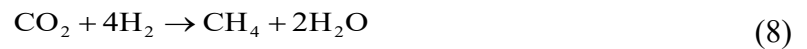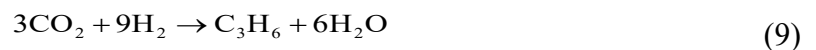

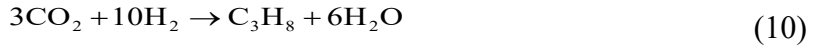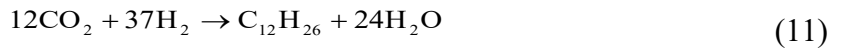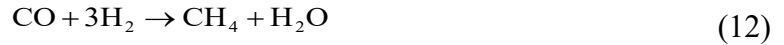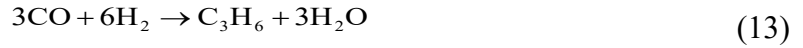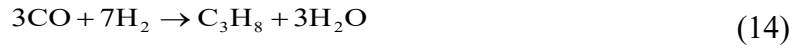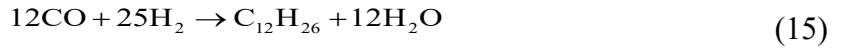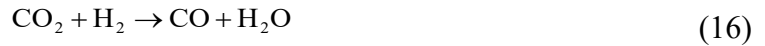

*Direct CO<sub>2</sub> hydrogenation to olefin (DH-O):* produces olefin (C<sub>2</sub>-C<sub>4</sub> hydrocarbon) from CO<sub>2</sub> and H<sub>2</sub> in one reactor filled by catalyst of Fe-K/γ-Al<sub>2</sub>O<sub>3</sub> and operated at 300 °C, 10 bar. RPlug reactor model was used, which embed kinetic metrics as shown in Table S2.6. Following separation target to separated olefin from liquid hydrocarbon (naphtha) as by-product, unreacted gas (CO<sub>2</sub>, H<sub>2</sub>) for recycling, and undesired gas (CO, CH<sub>4</sub>) for onsite heat and electricity generation. More description on DH-O can be found in Reference <sup>17</sup>.

**Table S2.6.** Kinetics and parameters for direct CO<sub>2</sub> hydrogenation to olefin <sup>17,18</sup>

| No | Reaction                                                                                 | a <sub>i</sub> | b <sub>i</sub> | K <sub>0i</sub><br>(mol/(s.g.MPa)) | E <sub>i</sub><br>(kJ/mol) |
|----|------------------------------------------------------------------------------------------|----------------|----------------|------------------------------------|----------------------------|
| 1  | CO <sub>2</sub> +H <sub>2</sub> ↔ CO+H <sub>2</sub> O                                    | 53.4768        | 4.5679         | 0.619e8                            | 136                        |
| 2  | CO+3H <sub>2</sub> → CH <sub>4</sub> +H <sub>2</sub> O                                   | 43.048         | 3.4174         | 0.3817e8                           | 135                        |
| 3  | 2CO+4H <sub>2</sub> → C <sub>2</sub> H <sub>4</sub> +2H <sub>2</sub> O                   | 41.1777        | 3.1104         | 4.0918e8                           | 146                        |
| 4  | 2CO+5H <sub>2</sub> → C <sub>2</sub> H <sub>6</sub> +2H <sub>2</sub> O                   | 85.9319        | 2.3182         | 0.4931e8                           | 141                        |
| 5  | 3CO+6H <sub>2</sub> → C <sub>3</sub> H <sub>6</sub> +3H <sub>2</sub> O                   | 15.9468        | 4.0486         | 2.5451e8                           | 147.1                      |
| 6  | 3CO+7H <sub>2</sub> → C <sub>3</sub> H <sub>8</sub> +3H <sub>2</sub> O                   | 55.5611        | 3.1525         | 0.0142e8                           | 127                        |
| 7  | 4CO+8H <sub>2</sub> → C <sub>4</sub> H <sub>8</sub> +4H <sub>2</sub> O                   | 30.9118        | 4.9477         | 0.0014e8                           | 111                        |
| 8  | 4CO+9H <sub>2</sub> → C <sub>4</sub> H <sub>10</sub> +4H <sub>2</sub> O                  | 87.9118        | 3.7471         | 84.4447                            | 87                         |
| 9  | nCO <sub>2</sub> +3nH <sub>2</sub> → (CH <sub>2</sub> ) <sub>n</sub> +2nH <sub>2</sub> O | 74.347         | 62.0165        | 36.5745                            | 150                        |

## S2.2. Simulation of CO<sub>2</sub>-to-fuel pathway

As proposed in CCU4E superstructure, there are 72 pathways for various fuel product from CO<sub>2</sub>. The process simulation of each pathway was performed in Aspen Plus software. In this part, we would present the simplified process flow diagram with stream information of some CO<sub>2</sub>-to-fuel pathways. Noted that the pathway number and integrated technologies for each was already presented in Table 1 in manuscript.

### S2.2.1. CO<sub>2</sub>-to-MeOH

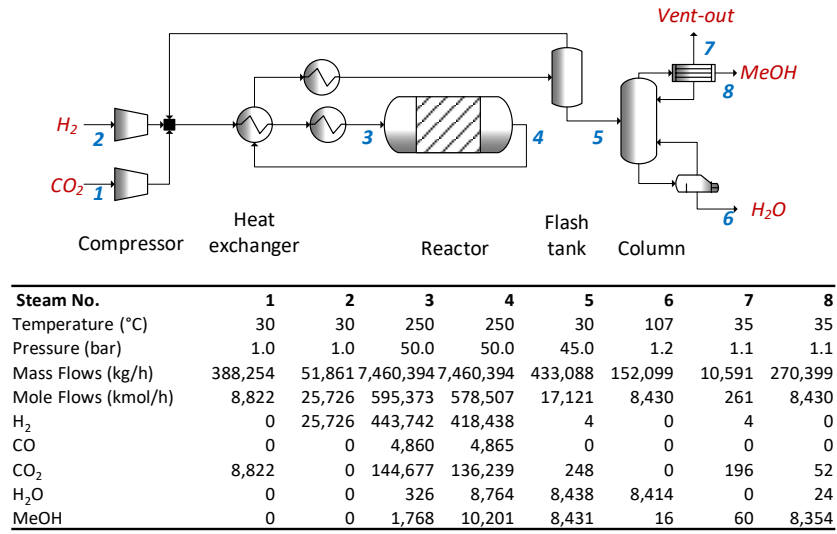

Fig. S2.2. Pathway #10 for methanol: Catalytic direct CO<sub>2</sub> hydrogenation to methanol

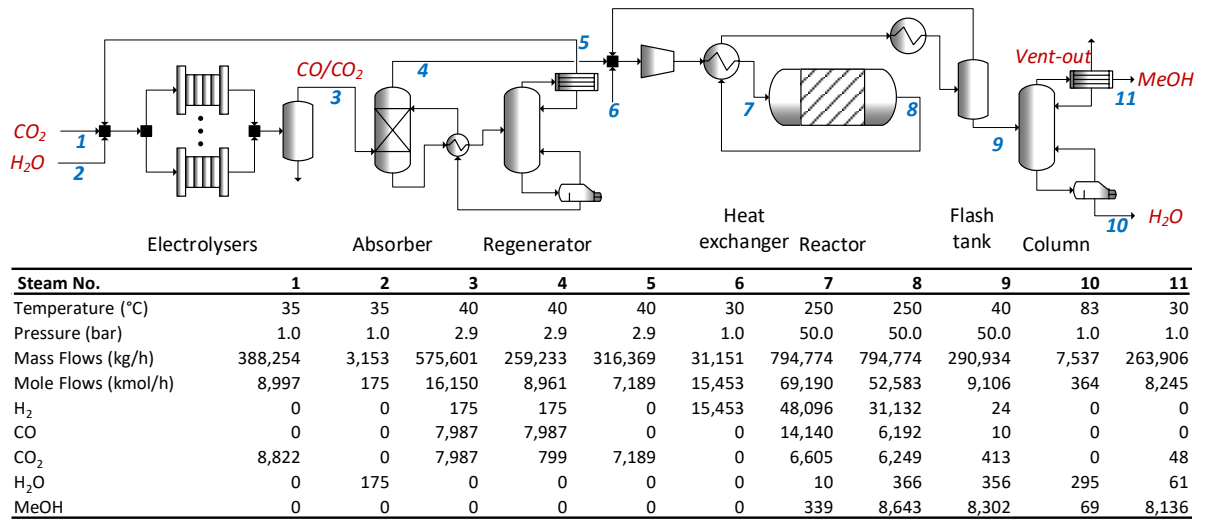

Fig. S2.3. Pathway #9 for methanol: Electrochemical CO<sub>2</sub> reduction to CO → CO<sub>2</sub>MEA → MeOH synthesis

### S2.2.2. CO<sub>2</sub>-to-FT fuels

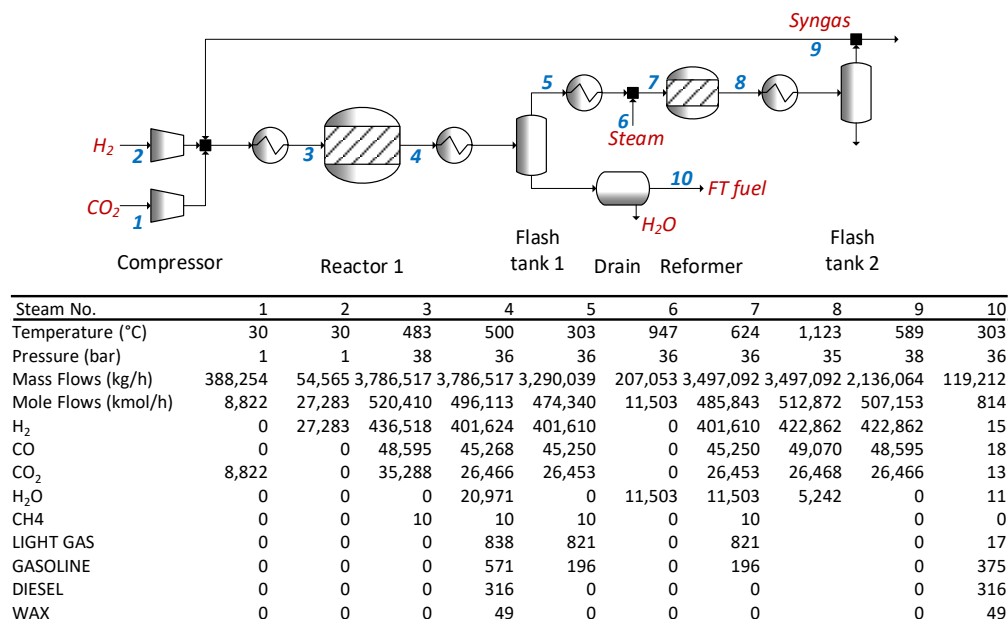

**Fig. S2.4.** Pathway #17 for FT fuels: Catalytic direct CO<sub>2</sub> hydrogenation to FT fuel

### S2.2.3. CO<sub>2</sub>-to-DME

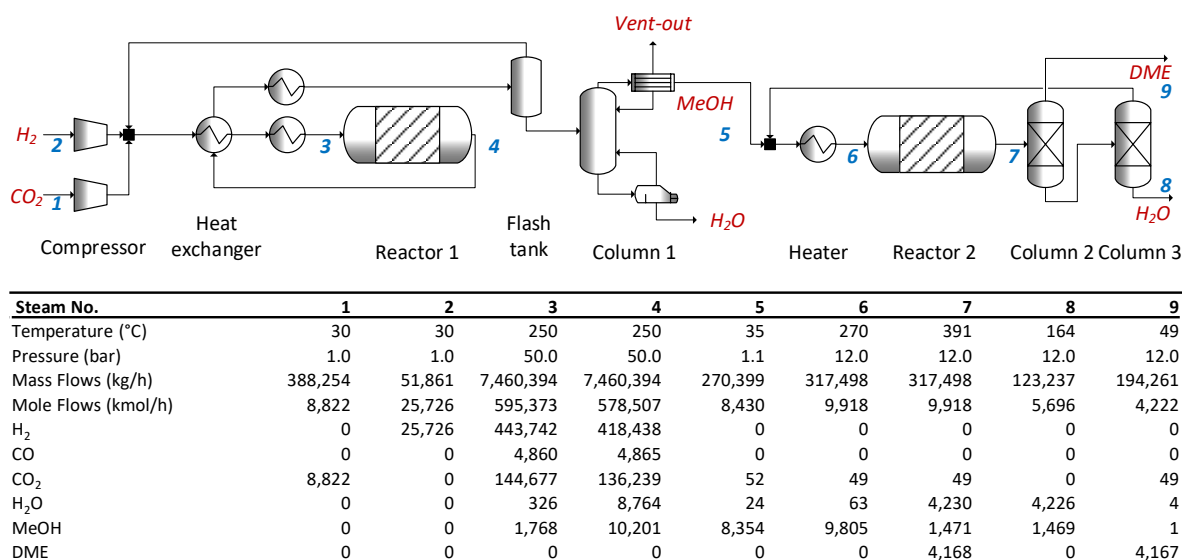

**Fig. S2.5.** Pathway #27 for dimethyl ether: Catalytic direct CO<sub>2</sub> hydrogenation to MeOH → Dehydration of MeOH to DME

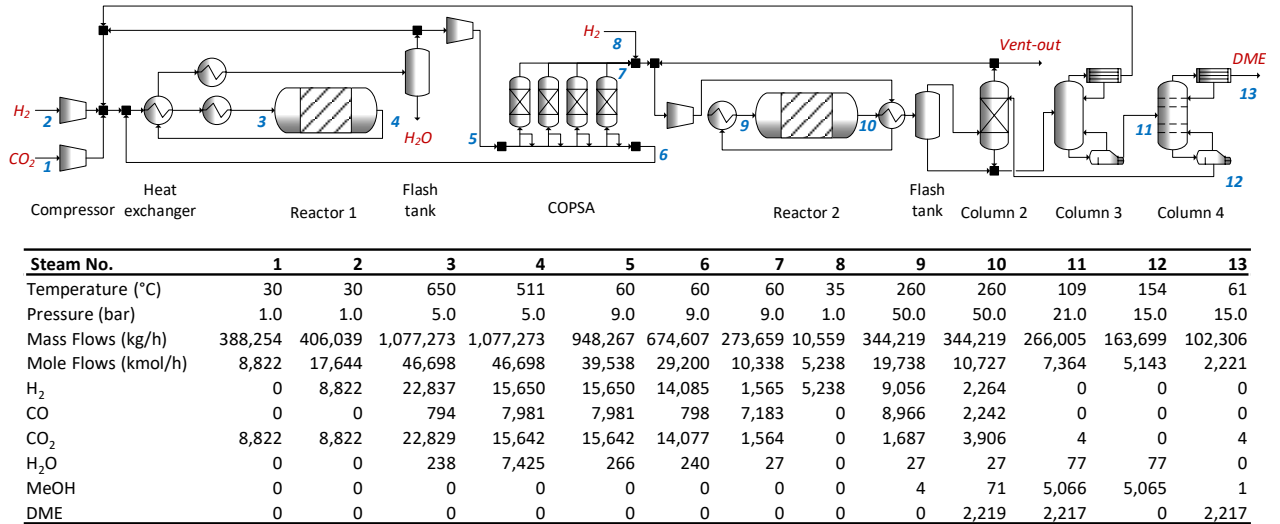

**Fig. S2.6.** Pathway #28 for dimethyl ether: Catalytic RWGS → COPSA → DME synthesis → Separation

### S2.2.4. CO<sub>2</sub>-to-olefin

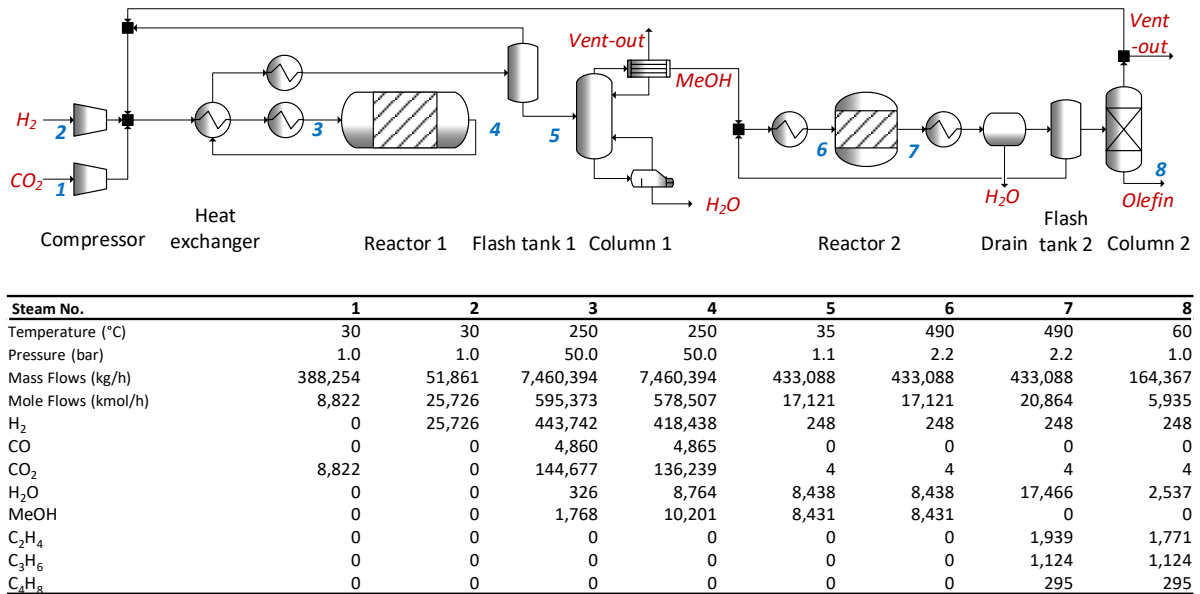

**Fig. S2.7.** Pathway #43 for olefin: Catalytic direct CO<sub>2</sub> hydrogenation to MeOH → Methanol-to-olefin

### S2.2.4. CO<sub>2</sub>-to-gasoline

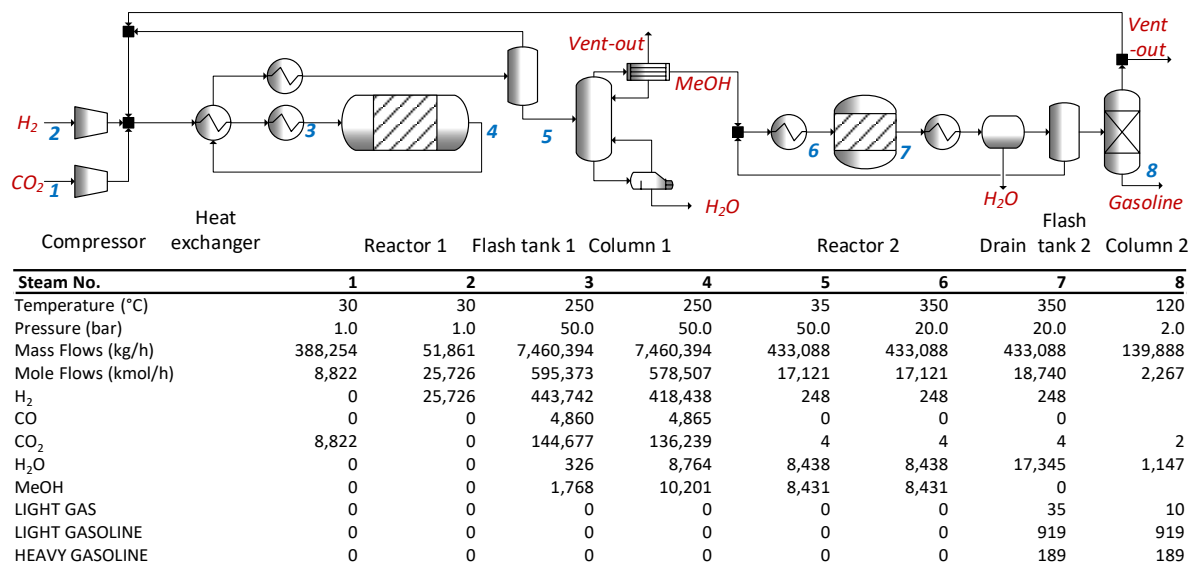

**Fig. S2.8.** Pathway #54 for gasoline: Catalytic direct CO<sub>2</sub> hydrogenation to MeOH → Methanol-to-gasoline



### S3. Economic, unit cost and CO<sub>2eq</sub> inventory assumptions

The economic parameters and cost of materials and utilities used in this study are presented in Table S3.1. Otherwise, The CO<sub>2eq</sub> inventory of raw material, conventional utility, and conventional fuels are presented in Table S3.2. Noted that using different raw material and utility sources (e.g., conventional or renewable based utility and H<sub>2</sub> feedstock) results in different Operating Cost (TOC) and indirect CO<sub>2</sub> emission (ICE).

**Table S3.1.** Economic assumptions and parameters

|                                            | Value      | Unit           | Ref. |
|--------------------------------------------|------------|----------------|------|
| <b>General parameters:</b>                 |            |                |      |
| Reference year                             | 2018       |                |      |
| Economic plant life                        | 20         | years          |      |
| Interest rate                              | 8          | %              |      |
| Operability                                | 8000       | h/y            |      |
| Scaling exponent                           | 0.67       | -              |      |
| Capacity Charge Factor (CCF)               | 0.1019     | -              |      |
| <b>Total capital investment cost (TCI)</b> | <b>373</b> | <b>% of PE</b> | 38   |
| Direct plant cost (DC)                     | 247        | % of PE        |      |
| Purchased equipment (PE)                   | 100        | % of PE        |      |
| Equipment setting                          | 39         | % of PE        |      |
| Instrumentation and control                | 26         | % of PE        |      |
| Piping                                     | 31         | % of PE        |      |
| Electrical installation                    | 10         | % of PE        |      |
| Land                                       | 12         | % of PE        |      |
| Building and building services             | 29         | % of PE        |      |
| Indirect plant cost (IDC)                  | 126        | % of PE        |      |
| Engineering                                | 32         | % of PE        |      |
| Construction expenses                      | 34         | % of PE        |      |
| Contractor's fee                           | 23         | % of PE        |      |
| Contingency                                | 37         | % of PE        |      |
| Fixed operating cost (FOC)                 | 5.1        | % of TCI       | 20   |
| <b>Materials and utilities:</b>            |            |                |      |
| <i>Raw material</i>                        |            |                |      |
| Captured CO <sub>2</sub>                   | 0.035      | \$/kg          | 26   |
| Renewable/green H <sub>2</sub>             | 4.415      | \$/kg          | 39   |
| Conventional/black H <sub>2</sub>          | 2.700      | \$/kg          | 40   |
| Process water                              | 0.001      | \$/kg          | 26   |
| <i>Solvent, other materials input</i>      |            |                |      |
| Adsorbent for CO                           | 50         | \$/kg          | 32   |
| Adsorbent for H <sub>2</sub>               | 6.11       | \$/kg          | 17   |
| <i>Conventional based utility</i>          |            |                |      |
| Electricity                                | 0.060      | \$/kWh         | 26   |
| Low-pressure steam                         | 0.014      | \$/kWh         | 26   |
| High-pressure steam                        | 0.019      | \$/kWh         | 26   |
| Fired heat                                 | 0.029      | \$/kWh         | 16   |
| Cooling water                              | 0.030      | \$/ton         | 26   |
| Refrigeration                              | 0.063      | \$/kWh         | 41   |
| <i>Renewable based utility</i>             |            |                |      |
| RES-Electricity                            | 0.073      | \$/kWh         | 26   |
| RES-Heat                                   | 0.050      | \$/kWh         | 26   |
| RES-Refrigeration                          | 0.066      | \$/kWh         | 41   |
| <b>Market prices:</b>                      |            |                |      |
| <i>Fuel products</i>                       |            |                |      |
| Methanol                                   | 0.400      | \$/kg          | 5    |

|                             |                    |       |    |
|-----------------------------|--------------------|-------|----|
| Ethanol                     | 1.003              | \$/kg | 42 |
| Olefin                      | 0.673              | \$/kg | 43 |
| Gasoline                    | 0.847 <sup>a</sup> | \$/kg | 44 |
| Fischer-Tropsch fuel        | 1.173              | \$/kg | 5  |
| Bio-diesel                  | 1.000              | \$/kg | 45 |
| Dimethyl ether              | 0.66               | \$/kg | 5  |
| Formic acid                 | 0.74               | \$/kg | 42 |
| <i>By-products</i>          |                    |       |    |
| Syngas (CO/H <sub>2</sub> ) | 0.550 <sup>b</sup> | \$/kg |    |
| Naphtha                     | 0.250              | \$/kg | 46 |
| Electricity                 | 0.073 <sup>c</sup> | \$/kg |    |

<sup>a</sup> Assumed at 2.5 \$/gal of gasoline  
<sup>b</sup> Estimated based on CO and H<sub>2</sub> price  
<sup>c</sup> Assumed at the same price of renewable electricity

**Table S3.2.** The CO<sub>2-eq</sub> inventory of raw material, conventional utility, and conventional fuels

|                             | Value  | Unit  | Ref |
|-----------------------------|--------|-------|-----|
| <b>Raw material</b>         |        |       |     |
| Captured CO <sub>2</sub>    | -1.00  | kg/kg |     |
| H <sub>2</sub> <sup>a</sup> | 3.5    | kg/kg | 40  |
| <b>Conventional utility</b> |        |       |     |
| Electricity                 | 0.6235 | kg/kg | 47  |
| Low-pressure steam          | 0.1875 | kg/kg | 48  |
| High-pressure steam         | 0.1875 | kg/kg | 48  |
| Fuel gas                    | 0.3406 | kg/kg | 48  |
| Refrigeration               | 1.4746 | kg/kg | 48  |
| <b>Fuel products</b>        |        |       |     |
| Methanol                    | 0.300  | kg/kg | 49  |
| Ethanol                     | 1.923  | kg/kg | 50  |
| Olefin                      | 2.797  | kg/kg | 48  |
| Gasoline                    | 3.102  | kg/kg | 50  |
| Fischer-Tropsch fuel        | 3.137  | kg/kg | 50  |
| Biodiesel                   | 0.039  | kg/kg | 48  |
| Dimethyl ether              | 1.000  | kg/kg | 48  |
| Formic acid                 | 2.510  | kg/kg | 49  |

<sup>a</sup> Assumed produced via steam methane reforming with carbon capture and storage facility (SMRwCCS).

## S4. Techno-economic and environmental performance results (green H<sub>2</sub>)

### S.4.1. Mass, energy, and economic data of each technology

Based on process simulation, the mass balance, energy balance, and economic data was obtained for each technology as shown in Table S4.1 – S4.2. Then, the metrics for full CO<sub>2</sub>-to-fuel pathways, which is integration of technologies, were also estimated and obtained (shown in Table 1 of manuscript)

**Table S4.1.** Technical, economic and environment data of each technology obtained from simulation

| Tech. | Group                     | Technology                | Input                            | Output                  | Yield | CAP (kg/h) | TCI (M\$) | ER (kWh) | DCE (kg/h) |
|-------|---------------------------|---------------------------|----------------------------------|-------------------------|-------|------------|-----------|----------|------------|
| 1     | Catalytic conversion      | RWGS 1                    | CO <sub>2</sub> , H <sub>2</sub> | CO <sub>2</sub> -rich 1 | 0.887 | 360,159    | 157.65    | 115,922  | 9          |
| 2     |                           | RWGS 2                    | CO <sub>2</sub> , H <sub>2</sub> | CO <sub>2</sub> -rich 4 | 0.682 | 277,032    | 257.76    | 298,149  | 39         |
| 3     |                           | RWGS 3                    | CO <sub>2</sub> , H <sub>2</sub> | CO <sub>2</sub> -rich 7 | 0.769 | 312,275    | 164.01    | 335,541  | 33         |
| 4     |                           | MS 1                      | CO <sub>2</sub> -rich 1          | Raw MeOH 1              | 0.948 | 371,459    | 478.92    | 411,221  | 11,357     |
| 5     |                           | MS 2                      | CO <sub>2</sub> -rich 2          | Raw MeOH 2              | 0.979 | 389,584    | 545.62    | 408,428  | 6,359      |
| 6     |                           | MS 3                      | CO <sub>2</sub> -rich 3          | Raw MeOH 3              | 0.982 | 352,009    | 457.31    | 334,527  | 4,692      |
| 7     |                           | MS 4                      | Syngas 4                         | Raw MeOH 4              | 0.987 | 301,726    | 362.69    | 220,013  | 2,293      |
| 8     |                           | MS 5                      | Syngas 5                         | Raw MeOH 5              | 0.987 | 308,531    | 364.81    | 238,724  | 2,731      |
| 9     |                           | MS 6                      | Syngas 6                         | Raw MeOH 6              | 0.991 | 290,793    | 347.96    | 187,319  | 1,284      |
| 10    |                           | MS 7                      | Syngas 7                         | Raw MeOH 7              | 0.985 | 324,201    | 449.88    | 287,269  | 3,617      |
| 11    |                           | MS 8                      | Syngas 8                         | Raw MeOH 8              | 0.987 | 308,648    | 412.82    | 250,647  | 2,732      |
| 12    |                           | MS 9                      | Syngas 9                         | Raw MeOH 9              | 0.991 | 290,934    | 390.84    | 250,647  | 1,284      |
| 13    |                           | DHCO <sub>2</sub> -MeOH 1 | CO <sub>2</sub> , H <sub>2</sub> | Raw MeOH 10             | 0.984 | 433,088    | 721.69    | 175,478  | 5,985      |
| 14    |                           | DMES 1                    | Syngas 4                         | Raw DME 11              | 0.999 | 283,924    | 293.09    | 75,996   | 27         |
| 15    |                           | DMES 2                    | Syngas 5                         | Raw DME 12              | 0.999 | 289,229    | 292.70    | 77,471   | 26         |
| 16    |                           | DMES 3                    | Syngas 6                         | Raw DME 13              | 1.00  | 273,684    | 298.83    | 83,888   | 30         |
| 17    |                           | DMES 4                    | Syngas 7                         | Raw DME 14              | 1.00  | 302,288    | 208.71    | 79,921   | 21         |
| 18    |                           | DMES 5                    | Syngas 8                         | Raw DME 15              | 1.00  | 289,342    | 292.75    | 77,515   | 26         |
| 19    |                           | DMES 6                    | Syngas 9                         | Raw DME 16              | 1.00  | 273,786    | 298.86    | 83,911   | 31         |
| 20    |                           | FTS 1                     | Syngas 4                         | FT fuel 1               | 0.27  | 82,312     | 798.27    | 900,087  | 3,211      |
| 21    |                           | FTS 2                     | Syngas 5                         | FT fuel 2               | 0.26  | 81,670     | 795.61    | 907,666  | 3,485      |
| 22    |                           | FTS 3                     | Syngas 6                         | FT fuel 3               | 0.28  | 83,605     | 782.62    | 859,714  | 2,912      |
| 23    |                           | FTS 4                     | Syngas 7                         | FT fuel 4               | 0.24  | 79,920     | 819.31    | 969,527  | 3,798      |
| 24    |                           | FTS 5                     | Syngas 8                         | FT fuel 5               | 0.26  | 81,706     | 795.72    | 908,017  | 3,486      |
| 25    |                           | FTS 6                     | Syngas 9                         | FT fuel 6               | 0.28  | 83,648     | 782.79    | 860,222  | 2,915      |
| 26    |                           | DHCO <sub>2</sub> -FT 1   | CO <sub>2</sub> , H <sub>2</sub> | FT fuel 7               | 0.27  | 119,212    | 880.48    | 437,800  | 145,858    |
| 27    |                           | DHCO <sub>2</sub> -O 1    | CO <sub>2</sub> , H <sub>2</sub> | Raw olefin 1            | 0.40  | 176,191    | 1,186.43  | 354,912  | 14,396     |
| 28    | Thermochemical energizing | CR5 1                     | CO <sub>2</sub>                  | CO <sub>2</sub> -rich 2 | 0.91  | 352,968    | 10,356.30 | 26,370   |            |

|    |                           |             |              |            |      |         |           |           |         |
|----|---------------------------|-------------|--------------|------------|------|---------|-----------|-----------|---------|
| 29 |                           | CR5 2       | CO2          | CO2-rich 5 | 0.72 | 280,796 | 31,403.34 | 114,700   |         |
| 30 |                           | CR5 3       | CO2          | CO2-rich 8 | 0.72 | 280,796 | 31,403.34 | 111,481   |         |
| 31 | Electrochemical reduction | Elec-S 1    | CO2          | CO2-rich 3 | 0.81 | 318,034 | 2,754.12  | 434,017   |         |
| 32 |                           | Elec-S 2    | CO2          | CO2-rich 6 | 0.67 | 260,815 | 4,986.99  | 785,906   |         |
| 33 |                           | Elec-S 3    | CO2          | CO2-rich 9 | 0.66 | 259,233 | 4,986.99  | 805,328   |         |
| 34 |                           | Elec-FA 1   | CO2          | Raw FA 1   | 0.67 | 361,486 | 15,640.50 | 1,676,735 | 1,885   |
| 35 |                           | Elec-FA     | CO2          | Raw EtOH 1 | 0.32 | 199,296 | 25,037.57 | 3,148,615 | 1,820   |
| 36 | Separation                | CO-PSA 1    | CO2-rich 4   | Syngas 4   | 0.98 | 273,659 | 2,991.53  | 18,601    | 3,098   |
| 37 |                           | CO-PSA 2    | CO2-rich 5   | Syngas 5   | 0.98 | 276,701 | 3,444.78  | 9,801     | 3,990   |
| 38 |                           | CO-PSA 3    | CO2-rich 6   | Syngas 6   | 0.99 | 259,093 | 1,930.97  | 45,231    | 1,582   |
| 39 |                           | CO2-MEA 1   | CO2-rich 7   | Syngas 7   | 0.95 | 298,114 | 32.41     | 841,185   | 6,001   |
| 40 |                           | CO2-MEA 2   | CO2-rich 8   | Syngas 8   | 0.99 | 276,806 | 30.19     | 756,388   | 3,990   |
| 41 |                           | CO2-MEA 3   | CO2-rich 9   | Syngas 9   | 1.00 | 259,233 | 28.61     | 698,303   | 1,582   |
| 42 |                           | SEP-MeOH 1  | Raw MeOH 1   | MeOH 1     | 0.67 | 249,861 | 27.75     | 231,946   | 25,372  |
| 43 |                           | SEP-MeOH 2  | Raw MeOH 2   | MeOH 2     | 0.65 | 253,538 | 32.28     | 243,792   | 26,479  |
| 44 |                           | SEP-MeOH 3  | Raw MeOH 3   | MeOH 3     | 0.73 | 255,491 | 31.25     | 221,899   | 25,680  |
| 45 |                           | SEP-MeOH 4  | Raw MeOH 4   | MeOH 4     | 0.86 | 259,415 | 26.76     | 170,773   | 21,073  |
| 46 |                           | SEP-MeOH 5  | Raw MeOH 5   | MeOH 5     | 0.83 | 256,482 | 27.59     | 203,507   | 22,470  |
| 47 |                           | SEP-MeOH 6  | Raw MeOH 6   | MeOH 6     | 0.91 | 264,255 | 24.82     | 150,303   | 15,911  |
| 48 |                           | SEP-MeOH 7  | Raw MeOH 7   | MeOH 7     | 0.78 | 253,149 | 45.47     | 235,083   | 24,186  |
| 49 |                           | SEP-MeOH 8  | Raw MeOH 8   | MeOH 8     | 0.83 | 256,594 | 27.59     | 203,566   | 22,477  |
| 50 |                           | SEP-MeOH 9  | Raw MeOH 9   | MeOH 9     | 0.91 | 263,906 | 23.82     | 118,289   | 16,073  |
| 51 |                           | SEP-MeOH 10 | Raw MeOH 10  | MeOH 10    | 0.62 | 270,399 | 11.90     | 207,718   | 8,643   |
| 52 |                           | SEP-DME 1   | Raw DME 1    | DME 1      | 0.72 | 179,506 | 38.93     | 150,381   |         |
| 53 |                           | SEP-DME 2   | Raw DME 2    | DME 2      | 0.72 | 182,147 | 39.32     | 152,594   |         |
| 54 |                           | SEP-DME 3   | Raw DME 3    | DME 3      | 0.72 | 183,550 | 39.52     | 153,769   |         |
| 55 |                           | SEP-DME 4   | Raw DME 4    | DME 4      | 0.72 | 186,369 | 39.92     | 156,131   |         |
| 56 |                           | SEP-DME 5   | Raw DME 5    | DME 5      | 0.72 | 184,262 | 39.62     | 154,366   |         |
| 57 |                           | SEP-DME 6   | Raw DME 6    | DME 6      | 0.72 | 189,847 | 40.42     | 159,044   |         |
| 58 |                           | SEP-DME 7   | Raw DME 7    | DME 7      | 0.72 | 181,868 | 39.27     | 152,360   |         |
| 59 |                           | SEP-DME 8   | Raw DME 8    | DME 8      | 0.72 | 184,343 | 39.63     | 154,434   |         |
| 60 |                           | SEP-DME 9   | Raw DME 9    | DME 9      | 0.72 | 189,596 | 40.39     | 158,834   |         |
| 61 |                           | SEP-DME 10  | Raw DME 10   | DME 10     | 0.72 | 194,261 | 41.05     | 162,742   |         |
| 62 |                           | SEP-DME 11  | Raw DME 11   | DME 11     | 0.36 | 102,306 | 30.45     | 118,378   | 178,987 |
| 63 |                           | SEP-DME 12  | Raw DME 12   | DME 12     | 0.33 | 95,613  | 29.58     | 113,076   | 179,711 |
| 64 |                           | SEP-DME 13  | Raw DME 13   | DME 13     | 0.42 | 113,816 | 33.45     | 125,712   | 157,457 |
| 65 |                           | SEP-DME 14  | Raw DME 14   | DME 14     | 0.27 | 80,462  | 28.58     | 98,047    | 209,859 |
| 66 |                           | SEP-DME 15  | Raw DME 15   | DME 15     | 0.33 | 95,667  | 44.23     | 103,671   | 191,668 |
| 67 |                           | SEP-DME 16  | Raw DME 16   | DME 16     | 0.42 | 113,886 | 33.45     | 125,699   | 157,493 |
| 68 |                           | SEP-O 1     | Raw olefin 1 | Olefin 11  | 0.39 | 68,270  | 1,213.90  | 133,589   | 24,791  |
| 69 |                           | SEP-FA 1    | Raw FA 1     | FA 1       | 0.99 | 359,366 | 63.29     | 11        | 42      |
| 70 |                           | SEP-EtOH 1  | Raw EtOH 1   | EtOH 1     | 0.24 | 47,900  | 203.04    | 22,254    |         |

|     |           |                |             |             |      |         |        |        |  |
|-----|-----------|----------------|-------------|-------------|------|---------|--------|--------|--|
| 71  | Upgrading | Dehydration 1  | MeOH 1      | Raw DME 1   | 1.00 | 249,858 | 547.00 | 82,171 |  |
| 72  |           | Dehydration 2  | MeOH 2      | Raw DME 2   | 1.00 | 253,535 | 552.38 | 83,380 |  |
| 73  |           | Dehydration 3  | MeOH 3      | Raw DME 3   | 1.00 | 255,488 | 555.23 | 84,022 |  |
| 74  |           | Dehydration 4  | MeOH 4      | Raw DME 4   | 1.00 | 259,412 | 560.93 | 85,313 |  |
| 75  |           | Dehydration 5  | MeOH 5      | Raw DME 5   | 1.00 | 256,479 | 556.67 | 84,348 |  |
| 76  |           | Dehydration 6  | MeOH 6      | Raw DME 6   | 1.00 | 264,252 | 567.92 | 86,904 |  |
| 77  |           | Dehydration 7  | MeOH 7      | Raw DME 7   | 1.00 | 253,146 | 551.82 | 83,252 |  |
| 78  |           | Dehydration 8  | MeOH 8      | Raw DME 8   | 1.00 | 256,591 | 556.84 | 84,385 |  |
| 79  |           | Dehydration 9  | MeOH 9      | Raw DME 9   | 1.00 | 263,903 | 567.42 | 86,789 |  |
| 80  |           | Dehydration 10 | MeOH 10     | Raw DME 10  | 1.00 | 270,396 | 576.73 | 88,925 |  |
| 81  |           | MTO 1          | Raw MeOH 1  | Olefin 1    | 0.38 | 140,552 | 4.03   | 0      |  |
| 82  |           | MTO 2          | Raw MeOH 2  | Olefin 2    | 0.38 | 147,410 | 4.23   | 0      |  |
| 83  |           | MTO 3          | Raw MeOH 3  | Olefin 3    | 0.38 | 133,193 | 3.82   | 0      |  |
| 84  |           | MTO 4          | Raw MeOH 4  | Olefin 4    | 0.38 | 114,167 | 3.28   | 0      |  |
| 85  |           | MTO 5          | Raw MeOH 5  | Olefin 5    | 0.38 | 116,741 | 3.35   | 0      |  |
| 86  |           | MTO 6          | Raw MeOH 6  | Olefin 6    | 0.38 | 110,030 | 3.16   | 0      |  |
| 87  |           | MTO 7          | Raw MeOH 7  | Olefin 7    | 0.38 | 122,671 | 3.52   | 0      |  |
| 88  |           | MTO 8          | Raw MeOH 8  | Olefin 8    | 0.38 | 116,786 | 3.35   | 0      |  |
| 89  |           | MTO 9          | Raw MeOH 9  | Olefin 9    | 0.38 | 110,083 | 3.16   | 0      |  |
| 90  |           | MTO 10         | Raw MeOH 10 | Olefin 10   | 0.38 | 163,871 | 4.70   | 0      |  |
| 91  |           | MTG 1          | Raw MeOH 1  | Gasoline 1  | 0.32 | 119,981 | 883.49 | 79     |  |
| 92  |           | MTG 2          | Raw MeOH 2  | Gasoline 2  | 0.32 | 125,836 | 912.15 | 83     |  |
| 93  |           | MTG 3          | Raw MeOH 3  | Gasoline 3  | 0.32 | 113,699 | 852.22 | 75     |  |
| 94  |           | MTG 4          | Raw MeOH 4  | Gasoline 4  | 0.32 | 97,458  | 768.61 | 65     |  |
| 95  |           | MTG 5          | Raw MeOH 5  | Gasoline 5  | 0.32 | 99,655  | 780.18 | 66     |  |
| 96  |           | MTG 6          | Raw MeOH 6  | Gasoline 6  | 0.32 | 93,926  | 749.83 | 62     |  |
| 97  |           | MTG 7          | Raw MeOH 7  | Gasoline 7  | 0.32 | 104,717 | 806.51 | 69     |  |
| 98  |           | MTG 8          | Raw MeOH 8  | Gasoline 8  | 0.32 | 99,693  | 780.37 | 66     |  |
| 99  |           | MTG 9          | Raw MeOH 9  | Gasoline 9  | 0.32 | 93,972  | 750.07 | 62     |  |
| 100 |           | MTG 10         | Raw MeOH 10 | Gasoline 10 | 0.32 | 139,888 | 979.19 | 93     |  |
| 101 |           | DTG 1          | Raw DME 1   | Gasoline 11 | 0.47 | 84,685  | 25.74  | 13,692 |  |
| 102 |           | DTG 2          | Raw DME 2   | Gasoline 12 | 0.47 | 85,931  | 25.99  | 13,894 |  |
| 103 |           | DTG 3          | Raw DME 3   | Gasoline 13 | 0.47 | 86,593  | 26.13  | 14,001 |  |
| 104 |           | DTG 4          | Raw DME 4   | Gasoline 14 | 0.47 | 87,923  | 26.39  | 14,216 |  |
| 105 |           | DTG 5          | Raw DME 5   | Gasoline 15 | 0.47 | 86,929  | 26.19  | 14,055 |  |
| 106 |           | DTG 6          | Raw DME 6   | Gasoline 16 | 0.47 | 89,563  | 26.72  | 14,481 |  |
| 107 |           | DTG 7          | Raw DME 7   | Gasoline 17 | 0.47 | 85,799  | 25.97  | 13,872 |  |
| 108 |           | DTG 8          | Raw DME 8   | Gasoline 18 | 0.47 | 86,967  | 26.20  | 14,061 |  |
| 109 |           | DTG 9          | Raw DME 9   | Gasoline 19 | 0.47 | 89,445  | 26.70  | 14,462 |  |
| 110 |           | DTG 10         | Raw DME 10  | Gasoline 20 | 0.47 | 91,646  | 27.14  | 14,818 |  |
| 111 |           | DTG 11         | DME 11      | Gasoline 21 | 0.47 | 48,265  | 17.66  | 7,804  |  |
| 112 |           | DTG 12         | DME 12      | Gasoline 22 | 0.47 | 45,107  | 16.88  | 7,293  |  |

|     |  |        |        |             |      |        |       |       |  |
|-----|--|--------|--------|-------------|------|--------|-------|-------|--|
| 113 |  | DTG 13 | DME 13 | Gasoline 23 | 0.47 | 53,694 | 18.97 | 8,682 |  |
| 114 |  | DTG 14 | DME 14 | Gasoline 24 | 0.47 | 37,959 | 15.04 | 6,137 |  |
| 115 |  | DTG 15 | DME 15 | Gasoline 25 | 0.47 | 45,133 | 16.88 | 7,297 |  |
| 116 |  | DTG 16 | DME 16 | Gasoline 26 | 0.47 | 53,728 | 18.98 | 8,687 |  |

**Table S4.2.** Obtained input mass and energy, and by-product of each technology from process simulation

| Tech. | Input materials           |                          |                            |                                     |                       |                |                      |                         |                  |                  |                              | Input energy |             |             |               |               |              | By-product       |                        |                   |                       |
|-------|---------------------------|--------------------------|----------------------------|-------------------------------------|-----------------------|----------------|----------------------|-------------------------|------------------|------------------|------------------------------|--------------|-------------|-------------|---------------|---------------|--------------|------------------|------------------------|-------------------|-----------------------|
|       | CO <sub>2</sub><br>(kg/h) | H <sub>2</sub><br>(kg/h) | H <sub>2</sub> O<br>(kg/h) | CO <sub>2</sub> -<br>rich<br>(kg/h) | Raw<br>MeOH<br>(kg/h) | MeOH<br>(kg/h) | Raw<br>DME<br>(kg/h) | Raw<br>olefin<br>(kg/h) | Raw FA<br>(kg/h) | Ads CO<br>(kg/h) | Ads H <sub>2</sub><br>(kg/h) | LP<br>(kWh)  | HP<br>(kWh) | FH<br>(kWh) | Elec<br>(kWh) | CW<br>(ton/h) | REF<br>(kWh) | Syngas<br>(kg/h) | Light<br>gas<br>(kg/h) | Naphtha<br>(kg/h) | Electricity<br>(kg/h) |
| 1     | 388,254                   | 17,784                   |                            |                                     |                       |                |                      |                         |                  |                  |                              |              |             | 100,339     | 15,583        | 114,433       |              |                  |                        |                   |                       |
| 2     | 388,254                   | 17,784                   |                            |                                     |                       |                |                      |                         |                  |                  |                              |              |             | 272,916     | 25,233        | 53,262        |              |                  |                        |                   |                       |
| 3     | 388,254                   | 17,784                   |                            |                                     |                       |                |                      |                         |                  |                  |                              |              |             | 319,933     | 15,608        | 56,565        |              |                  |                        |                   |                       |
| 4     |                           | 31,834                   |                            | 360,159                             |                       |                |                      |                         |                  |                  |                              | 290,025      |             |             | 121,196       | 88,583        |              |                  |                        |                   |                       |
| 5     |                           | 45,005                   |                            | 352,968                             |                       |                |                      |                         |                  |                  |                              | 321,357      |             |             | 87,071        | 100,765       |              |                  |                        |                   |                       |
| 6     |                           | 40,313                   |                            | 318,034                             |                       |                |                      |                         |                  |                  |                              | 252,302      |             |             | 82,225        | 83,200        |              |                  |                        |                   |                       |
| 7     |                           | 32,095                   |                            | 273,659                             |                       |                |                      |                         |                  |                  |                              | 158,794      |             |             | 61,219        | 57,347        |              |                  |                        |                   |                       |
| 8     |                           | 35,894                   |                            | 276,701                             |                       |                |                      |                         |                  |                  |                              | 175,763      |             |             | 62,961        | 61,804        |              |                  |                        |                   |                       |
| 9     |                           | 34,205                   |                            | 259,093                             |                       |                |                      |                         |                  |                  |                              | 125,932      |             |             | 61,387        | 50,929        |              |                  |                        |                   |                       |
| 10    |                           | 31,151                   |                            | 298,114                             |                       |                |                      |                         |                  |                  |                              | 208,395      |             |             | 78,874        | 70,998        |              |                  |                        |                   |                       |
| 11    |                           | 35,908                   |                            | 276,806                             |                       |                |                      |                         |                  |                  |                              | 175,807      |             |             | 74,840        | 63,626        |              |                  |                        |                   |                       |
| 12    |                           | 34,207                   |                            | 259,233                             |                       |                |                      |                         |                  |                  |                              | 175,807      |             |             | 74,840        | 63,626        |              |                  |                        |                   |                       |
| 13    | 388,254                   | 51,861                   |                            |                                     |                       |                |                      |                         |                  |                  |                              |              |             | 28,472      | 147,006       | 58,875        |              |                  |                        |                   |                       |
| 14    |                           | 10,559                   |                            | 273,659                             |                       |                |                      |                         |                  |                  |                              |              |             | 21,619      | 41,928        | 11,061        | 12,449       |                  |                        |                   |                       |
| 15    |                           | 12,815                   |                            | 276,701                             |                       |                |                      |                         |                  |                  |                              |              |             | 21,033      | 43,732        | 11,171        | 12,706       |                  |                        |                   |                       |
| 16    |                           | 14,928                   |                            | 259,093                             |                       |                |                      |                         |                  |                  |                              |              |             | 22,703      | 48,804        | 12,323        | 12,381       |                  |                        |                   |                       |
| 17    |                           | 4,389                    |                            | 298,114                             |                       |                |                      |                         |                  |                  |                              |              |             | 19,394      | 47,457        | 8,202         | 13,069       |                  |                        |                   |                       |
| 18    |                           | 12,823                   |                            | 276,806                             |                       |                |                      |                         |                  |                  |                              |              |             | 21,044      | 43,756        | 11,178        | 12,715       |                  |                        |                   |                       |
| 19    |                           | 14,919                   |                            | 259,233                             |                       |                |                      |                         |                  |                  |                              |              |             | 22,716      | 48,807        | 12,326        | 12,389       |                  |                        |                   |                       |
| 20    |                           | 36,451                   |                            | 273,659                             |                       |                |                      |                         |                  |                  |                              |              |             | 780,859     | 119,228       | 118,337       |              |                  |                        |                   |                       |
| 21    |                           | 40,102                   |                            | 276,701                             |                       |                |                      |                         |                  |                  |                              |              |             | 785,529     | 122,137       | 119,163       |              |                  |                        |                   |                       |
| 22    |                           | 37,618                   |                            | 259,093                             |                       |                |                      |                         |                  |                  |                              |              |             | 742,448     | 117,266       | 112,331       |              |                  |                        |                   |                       |
| 23    |                           | 36,187                   |                            | 298,114                             |                       |                |                      |                         |                  |                  |                              |              |             | 846,158     | 123,369       | 128,550       |              |                  |                        |                   |                       |
| 24    |                           | 40,118                   |                            | 276,806                             |                       |                |                      |                         |                  |                  |                              |              |             | 785,831     | 122,186       | 119,208       |              |                  |                        |                   |                       |
| 25    |                           | 37,623                   |                            | 259,233                             |                       |                |                      |                         |                  |                  |                              |              |             | 742,904     | 117,318       | 112,401       |              |                  |                        |                   |                       |
| 26    | 388,254                   | 54,565                   |                            |                                     |                       |                |                      |                         |                  |                  |                              |              |             | 273,443     | 164,358       | 67,850        |              |                  |                        |                   |                       |
| 27    | 388,254                   | 47,106                   |                            |                                     |                       |                |                      |                         |                  | 28               |                              | 211,818      |             |             | 143,094       | 81,191        |              |                  |                        | 60,111            |                       |
| 28    | 388,254                   |                          |                            |                                     |                       |                |                      |                         |                  |                  |                              |              |             |             | 26,370        | 5,864         |              |                  |                        |                   |                       |
| 29    | 388,254                   |                          |                            |                                     |                       |                |                      |                         |                  |                  |                              |              |             |             | 114,700       | 575,864       |              |                  |                        |                   |                       |
| 30    | 388,254                   |                          |                            |                                     |                       |                |                      |                         |                  |                  |                              |              |             |             | 111,481       | 19,428        |              |                  |                        |                   |                       |



|     |  |  |  |  |         |         |  |  |  |  |  |  |   |        |        |        |        |       |  |  |  |        |  |
|-----|--|--|--|--|---------|---------|--|--|--|--|--|--|---|--------|--------|--------|--------|-------|--|--|--|--------|--|
| 73  |  |  |  |  |         | 255,491 |  |  |  |  |  |  | 0 | 83,906 | 116    | 14,153 |        |       |  |  |  |        |  |
| 74  |  |  |  |  |         | 259,415 |  |  |  |  |  |  | 0 | 85,194 | 118    | 14,370 |        |       |  |  |  |        |  |
| 75  |  |  |  |  |         | 256,482 |  |  |  |  |  |  | 0 | 84,231 | 117    | 14,207 |        |       |  |  |  |        |  |
| 76  |  |  |  |  |         | 264,255 |  |  |  |  |  |  | 0 | 86,784 | 120    | 14,638 |        |       |  |  |  |        |  |
| 77  |  |  |  |  |         | 253,149 |  |  |  |  |  |  | 0 | 83,136 | 115    | 14,023 |        |       |  |  |  |        |  |
| 78  |  |  |  |  |         | 256,594 |  |  |  |  |  |  | 0 | 84,268 | 117    | 14,214 |        |       |  |  |  |        |  |
| 79  |  |  |  |  |         | 263,906 |  |  |  |  |  |  |   | 86,669 | 120    | 14,619 |        |       |  |  |  |        |  |
| 80  |  |  |  |  |         | 270,399 |  |  |  |  |  |  | 0 | 88,802 | 123    | 14,978 |        |       |  |  |  |        |  |
| 81  |  |  |  |  | 371,459 |         |  |  |  |  |  |  | 0 |        |        | 0      |        |       |  |  |  |        |  |
| 82  |  |  |  |  | 389,584 |         |  |  |  |  |  |  | 0 |        |        | 0      |        |       |  |  |  |        |  |
| 83  |  |  |  |  | 352,009 |         |  |  |  |  |  |  | 0 |        |        | 0      |        |       |  |  |  |        |  |
| 84  |  |  |  |  | 301,726 |         |  |  |  |  |  |  | 0 |        |        | 0      |        |       |  |  |  |        |  |
| 85  |  |  |  |  | 308,531 |         |  |  |  |  |  |  | 0 |        |        | 0      |        |       |  |  |  |        |  |
| 86  |  |  |  |  | 290,793 |         |  |  |  |  |  |  | 0 |        |        | 0      |        |       |  |  |  |        |  |
| 87  |  |  |  |  | 324,201 |         |  |  |  |  |  |  | 0 |        |        | 0      |        |       |  |  |  |        |  |
| 88  |  |  |  |  | 308,648 |         |  |  |  |  |  |  | 0 |        |        | 0      |        |       |  |  |  |        |  |
| 89  |  |  |  |  | 290,934 |         |  |  |  |  |  |  | 0 |        |        | 0      |        |       |  |  |  |        |  |
| 90  |  |  |  |  | 433,088 |         |  |  |  |  |  |  | 0 |        |        | 0      |        |       |  |  |  |        |  |
| 91  |  |  |  |  | 371,459 |         |  |  |  |  |  |  |   |        |        | 79     |        |       |  |  |  |        |  |
| 92  |  |  |  |  | 389,584 |         |  |  |  |  |  |  |   |        |        | 83     |        |       |  |  |  |        |  |
| 93  |  |  |  |  | 352,009 |         |  |  |  |  |  |  |   |        |        | 75     |        |       |  |  |  |        |  |
| 94  |  |  |  |  | 301,726 |         |  |  |  |  |  |  |   |        |        | 65     |        |       |  |  |  |        |  |
| 95  |  |  |  |  | 308,531 |         |  |  |  |  |  |  |   |        |        | 66     |        |       |  |  |  |        |  |
| 96  |  |  |  |  | 290,793 |         |  |  |  |  |  |  |   |        |        | 62     |        |       |  |  |  |        |  |
| 97  |  |  |  |  | 324,201 |         |  |  |  |  |  |  |   |        |        | 69     |        |       |  |  |  |        |  |
| 98  |  |  |  |  | 308,648 |         |  |  |  |  |  |  |   |        |        | 66     |        |       |  |  |  |        |  |
| 99  |  |  |  |  | 290,934 |         |  |  |  |  |  |  |   |        |        | 62     |        |       |  |  |  |        |  |
| 100 |  |  |  |  | 433,088 |         |  |  |  |  |  |  |   |        |        | 93     |        |       |  |  |  |        |  |
| 101 |  |  |  |  |         | 179,506 |  |  |  |  |  |  | 0 | 9      | 9,824  | 200    | 10,034 | 3,659 |  |  |  | 24,045 |  |
| 102 |  |  |  |  |         | 182,147 |  |  |  |  |  |  | 0 | 9      | 9,969  | 203    | 10,181 | 3,713 |  |  |  | 24,399 |  |
| 103 |  |  |  |  |         | 183,550 |  |  |  |  |  |  | 0 | 9      | 10,045 | 205    | 10,260 | 3,741 |  |  |  | 24,587 |  |
| 104 |  |  |  |  |         | 186,369 |  |  |  |  |  |  | 0 | 9      | 10,200 | 208    | 10,417 | 3,799 |  |  |  | 24,965 |  |
| 105 |  |  |  |  |         | 184,262 |  |  |  |  |  |  | 0 | 9      | 10,084 | 206    | 10,300 | 3,756 |  |  |  | 24,682 |  |
| 106 |  |  |  |  |         | 189,847 |  |  |  |  |  |  | 0 | 9      | 10,390 | 212    | 10,612 | 3,870 |  |  |  | 25,430 |  |
| 107 |  |  |  |  |         | 181,868 |  |  |  |  |  |  | 0 | 9      | 9,953  | 203    | 10,166 | 3,707 |  |  |  | 24,361 |  |
| 108 |  |  |  |  |         | 184,343 |  |  |  |  |  |  | 0 | 9      | 10,089 | 206    | 10,304 | 3,758 |  |  |  | 24,693 |  |
| 109 |  |  |  |  |         | 189,596 |  |  |  |  |  |  | 0 | 9      | 10,376 | 211    | 10,598 | 3,865 |  |  |  | 25,397 |  |
| 110 |  |  |  |  |         | 194,261 |  |  |  |  |  |  | 0 | 10     | 10,632 | 217    | 10,859 | 3,960 |  |  |  | 26,022 |  |
| 111 |  |  |  |  |         | 102,306 |  |  |  |  |  |  | 0 | 5      | 5,599  | 114    | 5,719  | 2,085 |  |  |  | 13,704 |  |
| 112 |  |  |  |  |         | 95,613  |  |  |  |  |  |  | 0 | 5      | 5,233  | 107    | 5,344  | 1,949 |  |  |  | 12,808 |  |
| 113 |  |  |  |  |         | 113,816 |  |  |  |  |  |  | 0 | 6      | 6,229  | 127    | 6,362  | 2,320 |  |  |  | 15,246 |  |
| 114 |  |  |  |  |         | 80,462  |  |  |  |  |  |  | 0 | 4      | 4,404  | 90     | 4,498  | 1,640 |  |  |  | 10,778 |  |



|     |  |  |  |  |  |  |         |  |  |  |  |   |   |       |     |       |       |  |        |  |  |
|-----|--|--|--|--|--|--|---------|--|--|--|--|---|---|-------|-----|-------|-------|--|--------|--|--|
| 115 |  |  |  |  |  |  | 95,667  |  |  |  |  | 0 | 5 | 5,236 | 107 | 5,348 | 1,950 |  | 12,815 |  |  |
| 116 |  |  |  |  |  |  | 113,886 |  |  |  |  | 0 | 6 | 6,233 | 127 | 6,366 | 2,321 |  | 15,255 |  |  |

## S4.2. Techno-economic and environmental performance of full CO<sub>2</sub>-to-fuel pathways in CCU4E

Table S4.3 presents not only the integration of technologies involved each CO<sub>2</sub>-to-fuel pathway (from CO<sub>2</sub> feedstock to final fuel products), but also the estimated sizing and costing data for the techno-economic and environmental analysis.

**Table S4.3.** Techno-economic parameters of 72 CO<sub>2</sub>-to-fuel pathways

| Pathway No. | Technology | Technology                                | Product | Yield | CAP (ton/h) | CAP (GGE/h) | ER (MWh) | DCE (ton/h) | TCI (M\$) | ACC (M\$) | FOC (M\$) | Credit (M\$) | Input materials         |                        |                          |           | Input energy/utilities |          |            |             |             |
|-------------|------------|-------------------------------------------|---------|-------|-------------|-------------|----------|-------------|-----------|-----------|-----------|--------------|-------------------------|------------------------|--------------------------|-----------|------------------------|----------|------------|-------------|-------------|
|             |            |                                           |         |       |             |             |          |             |           |           |           |              | CO <sub>2</sub> (ton/h) | H <sub>2</sub> (ton/h) | H <sub>2</sub> O (ton/h) | LPS (MWh) | HPS (MWh)              | FH (MWh) | Elec (MWh) | CW (Mton/h) | Refr. (MWh) |
| 1           | Catalytic. | RWGS-MS-SEP                               | MeOH    | 0.57  | 249.9       | 47,376.8    | 759.1    | 36.7        | 664.3     | 67.7      | 33.9      | 0.0          | 388.3                   | 49.6                   | 0.0                      | 231.9     | 290.0                  | 100.3    | 136.8      | 0.2         | 0.0         |
| 2           | Thermo.    | CR5-MS-SEP                                | MeOH    | 0.59  | 253.5       | 48,074.0    | 678.6    | 32.8        | 10,934.2  | 1,113.7   | 557.6     | 0.0          | 388.3                   | 45.0                   | 0.0                      | 243.8     | 321.4                  | 0.0      | 113.4      | 0.1         | 0.0         |
| 3           | Electro.   | ELECZCO-MS-SEP                            | MeOH    | 0.59  | 255.5       | 48,444.3    | 990.4    | 30.4        | 3,242.7   | 330.3     | 165.4     | 0.0          | 388.3                   | 40.3                   | 3.2                      | 221.9     | 252.3                  | 0.0      | 516.2      | 0.1         | 0.0         |
| 4           | Catalytic. | RWGS-COPSA-MS-SEP                         | MeOH    | 0.59  | 259.4       | 49,188.3    | 707.5    | 26.5        | 3,638.7   | 370.6     | 185.6     | 0.0          | 388.3                   | 49.9                   | 0.0                      | 170.8     | 158.8                  | 272.9    | 105.1      | 0.1         | 0.0         |
| 5           | Thermo.    | CR5-COPSA-MS-SEP                          | MeOH    | 0.60  | 256.5       | 48,632.2    | 566.7    | 29.2        | 35,240.5  | 3,589.3   | 1,797.3   | 0.0          | 388.3                   | 35.9                   | 0.0                      | 203.5     | 175.8                  | 0.0      | 187.5      | 0.7         | 0.0         |
| 6           | Electro.   | ELECZCO-COPSA-MS-SEP                      | MeOH    | 0.62  | 264.3       | 50,106.1    | 1,168.8  | 18.8        | 7,290.7   | 742.6     | 371.8     | 0.0          | 388.3                   | 34.2                   | 3.2                      | 150.3     | 125.9                  | 0.0      | 892.5      | 0.1         | 0.0         |
| 7           | Catalytic. | RWGS-CO <sub>2</sub> MEA-MS-SEP           | MeOH    | 0.58  | 253.1       | 48,000.2    | 1,699.1  | 33.8        | 691.8     | 70.5      | 35.3      | 0.0          | 388.3                   | 48.9                   | 0.0                      | 1,076.0   | 208.4                  | 319.9    | 94.8       | 0.3         | 0.0         |
| 8           | Thermo.    | CR5-CO <sub>2</sub> MEA-MS-SEP            | MeOH    | 0.60  | 256.6       | 48,653.4    | 1,322.1  | 29.2        | 31,873.9  | 3,246.4   | 1,625.6   | 0.0          | 388.3                   | 35.9                   | 0.0                      | 959.7     | 175.8                  | 0.0      | 186.6      | 0.2         | 0.0         |
| 9           | Electro.   | ELECZCO-CO <sub>2</sub> MEA-MS-SEP        | MeOH    | 0.62  | 263.9       | 50,039.9    | 1,872.6  | 18.9        | 5,430.3   | 553.1     | 276.9     | 0.0          | 388.3                   | 34.2                   | 3.2                      | 816.3     | 175.8                  | 0.0      | 880.4      | 0.2         | 0.0         |
| 10          | Catalytic. | DHM-SEP                                   | MeOH    | 0.61  | 270.4       | 51,271.0    | 383.2    | 14.6        | 733.6     | 74.7      | 37.4      | 0.0          | 388.3                   | 51.9                   | 0.0                      | 207.7     | 0.0                    | 28.5     | 147.0      | 0.1         | 0.0         |
| 11          | Catalytic. | RWGS-COPSA-FTS-SEP                        | FT fuel | 0.19  | 82.3        | 30,875.5    | 1,216.8  | 6.3         | 4,047.6   | 412.3     | 206.4     | 0.0          | 388.3                   | 54.2                   | 0.0                      | 0.0       | 0.0                    | 1,053.8  | 163.1      | 0.2         | 0.0         |
| 12          | Thermo.    | CR5-COPSA-FTS-SEP                         | FT fuel | 0.19  | 81.7        | 30,634.7    | 1,032.2  | 7.5         | 35,643.7  | 3,630.4   | 1,817.8   | 0.0          | 388.3                   | 40.1                   | 0.0                      | 0.0       | 0.0                    | 785.5    | 246.6      | 0.7         | 0.0         |
| 13          | Electro.   | ELECZCO-COPSA-FTS-SEP                     | FT fuel | 0.19  | 83.6        | 31,360.5    | 1,690.9  | 4.5         | 7,700.6   | 784.3     | 392.7     | 0.0          | 388.3                   | 37.6                   | 3.2                      | 0.0       | 0.0                    | 742.4    | 948.4      | 0.1         | 0.0         |
| 14          | Catalytic. | RWGS-CO <sub>2</sub> MEA-FTS-SEP          | FT fuel | 0.18  | 79.9        | 29,978.2    | 2,146.3  | 9.8         | 1,015.7   | 103.5     | 51.8      | 0.0          | 388.3                   | 54.0                   | 0.0                      | 840.9     | 0.0                    | 1,166.1  | 139.3      | 0.3         | 0.0         |
| 15          | Thermo.    | CR5-CO <sub>2</sub> MEA-FTS-SEP           | FT fuel | 0.19  | 81.7        | 30,648.2    | 1,775.9  | 7.5         | 32,229.2  | 3,282.6   | 1,643.7   | 0.0          | 388.3                   | 40.1                   | 0.0                      | 756.1     | 0.0                    | 785.8    | 234.0      | 0.2         | 0.0         |
| 16          | Electro.   | ELECZCO-CO <sub>2</sub> MEA-FTS-SEP       | FT fuel | 0.19  | 83.6        | 31,376.6    | 2,363.9  | 4.5         | 5,798.4   | 590.6     | 295.7     | 0.0          | 388.3                   | 37.6                   | 3.2                      | 698.0     | 0.0                    | 742.9    | 922.9      | 0.2         | 0.0         |
| 17          | Catalytic. | DHFT-SEP                                  | FT fuel | 0.27  | 119.2       | 44,716.8    | 437.8    | 145.9       | 880.5     | 89.7      | 44.9      | 0.0          | 388.3                   | 54.6                   | 0.0                      | 0.0       | 0.0                    | 273.4    | 164.4      | 0.1         | 0.0         |
| 18          | Catalytic. | RWGS-MS-DEHYDR-SEP                        | DME     | 0.41  | 179.5       | 46,911.3    | 991.6    | 36.7        | 1,250.3   | 127.3     | 63.8      | 0.0          | 388.3                   | 49.6                   | 0.0                      | 231.9     | 440.4                  | 182.4    | 136.9      | 0.3         | 0.0         |
| 19          | Thermo.    | CR5-MS-DEHYDR-SEP                         | DME     | 0.42  | 182.1       | 47,601.5    | 914.6    | 32.8        | 11,525.9  | 1,173.9   | 587.8     | 0.0          | 388.3                   | 45.0                   | 0.0                      | 243.8     | 474.0                  | 83.3     | 113.6      | 0.2         | 0.0         |
| 20          | Electro.   | ELECZCO-MS-DEHYDR-SEP                     | DME     | 0.43  | 183.6       | 47,968.1    | 1,228.2  | 30.4        | 3,837.4   | 390.8     | 195.7     | 0.0          | 388.3                   | 40.3                   | 3.2                      | 221.9     | 406.1                  | 83.9     | 516.4      | 0.2         | 0.0         |
| 21          | Catalytic. | RWGS-COPSA-MS-DEHYDR-SEP                  | DME     | 0.43  | 186.4       | 48,704.8    | 949.0    | 26.5        | 4,239.6   | 431.8     | 216.2     | 0.0          | 388.3                   | 49.9                   | 0.0                      | 170.8     | 314.9                  | 358.1    | 105.2      | 0.2         | 0.0         |
| 22          | Thermo.    | CR5-COPSA-MS-DEHYDR-SEP                   | DME     | 0.43  | 184.3       | 48,154.2    | 805.4    | 29.2        | 35,836.8  | 3,650.1   | 1,827.7   | 0.0          | 388.3                   | 35.9                   | 0.0                      | 203.5     | 330.1                  | 84.2     | 187.6      | 0.7         | 0.0         |
| 23          | Electro.   | ELECZCO-COPSA-MS-DEHYDR-SEP               | DME     | 0.45  | 189.8       | 49,613.8    | 1,414.7  | 18.8        | 7,899.1   | 804.5     | 402.9     | 0.0          | 388.3                   | 34.2                   | 3.2                      | 150.3     | 285.0                  | 86.8     | 892.6      | 0.1         | 0.0         |
| 24          | Catalytic. | RWGS-CO <sub>2</sub> MEA-MS-DEHYDR-SEP    | DME     | 0.42  | 181.9       | 47,528.6    | 1,934.7  | 33.8        | 1,282.9   | 130.7     | 65.4      | 0.0          | 388.3                   | 48.9                   | 0.0                      | 1,076.0   | 360.8                  | 403.1    | 94.9       | 0.3         | 0.0         |
| 25          | Thermo.    | CR5-CO <sub>2</sub> MEA-MS-DEHYDR-SEP     | DME     | 0.43  | 184.3       | 48,175.4    | 1,560.9  | 29.2        | 32,470.4  | 3,307.2   | 1,656.0   | 0.0          | 388.3                   | 35.9                   | 0.0                      | 959.7     | 330.2                  | 84.3     | 186.7      | 0.3         | 0.0         |
| 26          | Electro.   | ELECZCO-CO <sub>2</sub> MEA-MS-DEHYDR-SEP | DME     | 0.45  | 189.6       | 49,548.2    | 2,118.2  | 18.9        | 6,038.1   | 615.0     | 307.9     | 0.0          | 388.3                   | 34.2                   | 3.2                      | 816.3     | 334.6                  | 86.7     | 880.5      | 0.2         | 0.0         |
| 27          | Catalytic. | DHM-DEHYDR-SEP                            | DME     | 0.44  | 194.3       | 50,767.3    | 634.9    | 14.6        | 1,351.4   | 137.6     | 68.9      | 0.0          | 388.3                   | 51.9                   | 0.0                      | 207.7     | 162.7                  | 117.3    | 147.1      | 0.1         | 0.0         |
| 28          | Catalytic. | RWGS-COPSA-DMES-SEP                       | DME     | 0.43  | 179.5       | 46,911.3    | 511.1    | 182.2       | 3,572.8   | 363.9     | 182.2     | 0.0          | 388.3                   | 28.3                   | 0.0                      | 61.2      | 0.0                    | 294.5    | 86.7       | 0.1         | 68.7        |
| 29          | Thermo.    | CR5-COPSA-DMES-SEP                        | DME     | 0.45  | 182.1       | 47,601.5    | 315.0    | 183.7       | 35,170.4  | 3,582.2   | 1,793.7   | 0.0          | 388.3                   | 12.8                   | 0.0                      | 58.7      | 0.0                    | 21.0     | 169.1      | 0.6         | 66.2        |
| 30          | Electro.   | ELECZCO-COPSA-DMES-SEP                    | DME     | 0.28  | 113.8       | 29,744.2    | 1,040.7  | 159.1       | 7,250.2   | 738.5     | 369.8     | 0.0          | 388.3                   | 14.9                   | 3.2                      | 64.6      | 0.0                    | 22.7     | 881.0      | 0.0         | 72.4        |
| 31          | Catalytic. | RWGS-CO <sub>2</sub> MEA-DMES-SEP         | DME     | 0.20  | 80.5        | 21,027.6    | 1,354.7  | 215.9       | 433.7     | 44.2      | 22.1      | 0.0          | 388.3                   | 22.2                   | 0.0                      | 894.0     | 0.0                    | 339.3    | 64.1       | 0.2         | 57.2        |
| 32          | Thermo.    | CR5-CO <sub>2</sub> MEA-DMES-SEP          | DME     | 0.24  | 95.7        | 25,001.2    | 1,049.1  | 195.7       | 31,770.5  | 3,235.9   | 1,620.3   | 0.0          | 388.3                   | 12.8                   | 0.0                      | 820.8     | 0.0                    | 21.0     | 156.4      | 0.1         | 50.9        |
| 33          | Electro.   | ELECZCO-CO <sub>2</sub> MEA-DMES-SEP      | DME     | 0.28  | 113.9       | 29,762.5    | 1,713.2  | 159.1       | 5,347.9   | 544.7     | 272.7     | 0.0          | 388.3                   | 14.9                   | 3.2                      | 762.7     | 0.0                    | 22.7     | 855.4      | 0.1         | 72.4        |
| 34          | Catalytic. | RWGS-MS-MTO                               | Olefin  | 0.32  | 140.6       | 53,648.5    | 527.1    | 11.4        | 640.6     | 65.2      | 32.7      | 0.0          | 388.3                   | 49.6                   | 0.0                      | 0.0       | 290.0                  | 100.3    | 136.8      | 0.2         | 0.0         |
| 35          | Thermo.    | CR5-MS-MTO                                | Olefin  | 0.34  | 147.4       | 56,266.1    | 541.4    | 6.4         | 10,906.2  | 1,110.8   | 556.2     | 0.0          | 388.3                   | 45.0                   | 0.0                      | 321.4     | 0.0                    | 113.4    | 106.6      | 0.0         | 0.0         |

|    |            |                                               |          |      |       |          |         |       |          |         |         |       |       |      |       |         |       |         |         |     |      |
|----|------------|-----------------------------------------------|----------|------|-------|----------|---------|-------|----------|---------|---------|-------|-------|------|-------|---------|-------|---------|---------|-----|------|
| 36 | Electro.   | ELECZCO-MS-MTO                                | Olefin   | 0.31 | 133.2 | 50,839.5 | 768.5   | 4.7   | 3,215.3  | 327.5   | 164.0   | 0.0   | 388.3 | 40.3 | 3.2   | 0.0     | 252.3 | 0.0     | 516.2   | 0.1 | 0.0  |
| 37 | Catalytic. | RWGS-COPSA-MS-MTO                             | Olefin   | 0.26 | 114.2 | 43,577.3 | 536.8   | 5.4   | 3,615.3  | 368.2   | 184.4   | 0.0   | 388.3 | 49.9 | 0.0   | 0.0     | 158.8 | 272.9   | 105.1   | 0.1 | 0.0  |
| 38 | Thermo.    | CR5-COPSA-MS-MTO                              | Olefin   | 0.28 | 116.7 | 44,559.8 | 363.2   | 6.7   | 35,216.3 | 3,586.9 | 1,796.0 | 0.0   | 388.3 | 35.9 | 0.0   | 0.0     | 175.8 | 0.0     | 187.5   | 0.7 | 0.0  |
| 39 | Electro.   | ELECZCO-COPSA-MS-MTO                          | Olefin   | 0.26 | 110.0 | 41,998.3 | 1,018.5 | 2.9   | 7,269.1  | 740.4   | 370.7   | 0.0   | 388.3 | 34.2 | 3.2   | 0.0     | 125.9 | 0.0     | 892.5   | 0.1 | 0.0  |
| 40 | Catalytic. | RWGS-CO <sub>2</sub> MEA-MS-MTO               | Olefin   | 0.29 | 122.7 | 46,823.3 | 1,018.5 | 2.9   | 7,269.4  | 740.4   | 370.7   | 0.0   | 388.3 | 34.2 | 3.2   | 0.0     | 125.9 | 0.0     | 892.5   | 0.1 | 0.0  |
| 41 | Thermo.    | CR5-CO <sub>2</sub> MEA-MS-MTO                | Olefin   | 0.28 | 116.8 | 44,577.0 | 1,118.5 | 6.7   | 31,849.7 | 3,244.0 | 1,624.3 | 0.0   | 388.3 | 35.9 | 0.0   | 756.1   | 175.8 | 0.0     | 186.6   | 0.2 | 0.0  |
| 42 | Electro.   | ELECZCO-CO <sub>2</sub> MEA-MS-MTO            | Olefin   | 0.26 | 110.1 | 42,018.5 | 1,754.3 | 2.9   | 5,409.6  | 551.0   | 275.9   | 0.0   | 388.3 | 34.2 | 3.2   | 698.0   | 175.8 | 0.0     | 880.4   | 0.2 | 0.0  |
| 43 | Catalytic. | DHM-MTO                                       | Olefin   | 0.37 | 163.9 | 62,549.3 | 175.5   | 6.0   | 726.4    | 74.0    | 37.0    | 0.0   | 388.3 | 51.9 | 0.0   | 0.0     | 0.0   | 28.5    | 147.0   | 0.1 | 0.0  |
| 44 | Catalytic. | DHO-SEP                                       | Olefin   | 0.16 | 68.3  | 26,058.5 | 488.5   | 39.2  | 2,400.3  | 244.5   | 122.4   | 120.2 | 388.3 | 47.1 | 0.0   | 7.8     | 256.6 | 0.0     | 204.2   | 0.1 | 19.9 |
| 45 | Catalytic. | RWGS-MS-MTG                                   | Gasoline | 0.27 | 120.0 | 45,895.5 | 527.2   | 11.4  | 1,520.1  | 154.8   | 77.5    | 0.0   | 388.3 | 49.6 | 0.0   | 0.0     | 290.0 | 100.3   | 136.9   | 0.2 | 0.0  |
| 46 | Thermo.    | CR5-MS-MTG                                    | Gasoline | 0.29 | 125.8 | 48,135.1 | 434.9   | 6.4   | 11,814.1 | 1,203.3 | 602.5   | 0.0   | 388.3 | 45.0 | 0.0   | 0.0     | 321.4 | 0.0     | 113.5   | 0.1 | 0.0  |
| 47 | Electro.   | ELECZCO-MS-MTG                                | Gasoline | 0.26 | 113.7 | 43,492.4 | 768.6   | 4.7   | 4,063.7  | 413.9   | 207.2   | 0.0   | 388.3 | 40.3 | 3.2   | 0.0     | 252.3 | 0.0     | 516.3   | 0.1 | 0.0  |
| 48 | Catalytic. | RWGS-COPSA-MS-MTG                             | Gasoline | 0.22 | 97.5  | 37,279.9 | 536.8   | 5.4   | 4,380.6  | 446.2   | 223.4   | 0.0   | 388.3 | 49.9 | 0.0   | 0.0     | 158.8 | 272.9   | 105.1   | 0.1 | 0.0  |
| 49 | Thermo.    | CR5-COPSA-MS-MTG                              | Gasoline | 0.23 | 99.7  | 38,120.3 | 363.3   | 6.7   | 35,993.1 | 3,666.0 | 1,835.6 | 0.0   | 388.3 | 35.9 | 0.0   | 0.0     | 175.8 | 0.0     | 187.5   | 0.7 | 0.0  |
| 50 | Electro.   | ELECZCO-COPSA-MS-MTG                          | Gasoline | 0.22 | 93.9  | 35,928.8 | 1,018.5 | 2.9   | 8,015.8  | 816.4   | 408.8   | 0.0   | 388.3 | 34.2 | 3.2   | 0.0     | 125.9 | 0.0     | 892.6   | 0.1 | 0.0  |
| 51 | Catalytic. | RWGS-CO <sub>2</sub> MEA-MS-MTG               | Gasoline | 0.24 | 104.7 | 40,056.6 | 1,464.1 | 9.7   | 1,452.8  | 148.0   | 74.1    | 0.0   | 388.3 | 48.9 | 0.0   | 840.9   | 208.4 | 319.9   | 94.9    | 0.2 | 0.0  |
| 52 | Thermo.    | CR5-CO <sub>2</sub> MEA-MS-MTG                | Gasoline | 0.24 | 99.7  | 38,134.8 | 1,118.6 | 6.7   | 32,626.7 | 3,323.1 | 1,664.0 | 0.0   | 388.3 | 35.9 | 0.0   | 756.1   | 175.8 | 0.0     | 186.7   | 0.2 | 0.0  |
| 53 | Electro.   | ELECZCO-CO <sub>2</sub> MEA-MS-MTG            | Gasoline | 0.22 | 94.0  | 35,946.4 | 1,754.3 | 2.9   | 6,156.5  | 627.1   | 314.0   | 0.0   | 388.3 | 34.2 | 3.2   | 698.0   | 175.8 | 0.0     | 880.5   | 0.2 | 0.0  |
| 54 | Catalytic. | DHM-MTG                                       | Gasoline | 0.32 | 139.9 | 53,510.3 | 175.6   | 6.0   | 1,700.9  | 173.2   | 86.7    | 0.0   | 388.3 | 51.9 | 0.0   | 0.0     | 0.0   | 28.5    | 147.1   | 0.1 | 0.0  |
| 55 | Catalytic. | RWGS-MS-DEHYDR-SEP-DTG                        | Gasoline | 0.19 | 84.7  | 32,393.9 | 1,005.3 | 36.7  | 1,276.0  | 130.0   | 65.1    | 48.1  | 388.3 | 49.6 | 0.0   | 231.9   | 440.4 | 192.2   | 137.1   | 0.3 | 3.7  |
| 56 | Thermo.    | CR5-MS-DEHYDR-SEP-DTG                         | Gasoline | 0.20 | 85.9  | 32,870.6 | 928.5   | 32.8  | 11,551.9 | 1,176.6 | 589.1   | 48.8  | 388.3 | 45.0 | 0.0   | 243.8   | 474.0 | 93.2    | 113.8   | 0.2 | 3.7  |
| 57 | Electro.   | ELECZCO-MS-DEHYDR-SEP-DTG                     | Gasoline | 0.20 | 86.6  | 33,123.7 | 1,242.2 | 30.4  | 3,863.5  | 393.5   | 197.0   | 49.2  | 388.3 | 40.3 | 3.2   | 221.9   | 406.1 | 94.0    | 516.6   | 0.2 | 3.7  |
| 58 | Catalytic. | RWGS-COPSA-MS-DEHYDR-SEP-DTG                  | Gasoline | 0.20 | 87.9  | 33,632.5 | 963.2   | 26.5  | 4,266.0  | 434.5   | 217.6   | 49.9  | 388.3 | 49.9 | 0.0   | 170.8   | 314.9 | 368.3   | 105.4   | 0.2 | 3.8  |
| 59 | Thermo.    | CR5-COPSA-MS-DEHYDR-SEP-DTG                   | Gasoline | 0.20 | 86.9  | 33,252.2 | 819.5   | 29.2  | 35,863.0 | 3,652.7 | 1,829.0 | 49.4  | 388.3 | 35.9 | 0.0   | 203.5   | 330.1 | 94.3    | 187.8   | 0.7 | 3.8  |
| 60 | Electro.   | ELECZCO-COPSA-MS-DEHYDR-SEP-DTG               | Gasoline | 0.21 | 89.6  | 34,260.0 | 1,429.2 | 18.8  | 7,925.8  | 807.3   | 404.2   | 50.9  | 388.3 | 34.2 | 3.2   | 150.3   | 285.0 | 97.2    | 892.9   | 0.1 | 3.9  |
| 61 | Catalytic. | RWGS-CO <sub>2</sub> MEA-MS-DEHYDR-SEP-DTG    | Gasoline | 0.20 | 85.8  | 32,820.1 | 1,948.6 | 33.8  | 1,308.8  | 133.3   | 66.8    | 48.7  | 388.3 | 48.9 | 0.0   | 1,076.0 | 360.8 | 413.0   | 95.1    | 0.3 | 3.7  |
| 62 | Thermo.    | CR5-CO <sub>2</sub> MEA-MS-DEHYDR-SEP-DTG     | Gasoline | 0.21 | 87.0  | 33,266.8 | 1,575.0 | 29.2  | 32,496.6 | 3,309.9 | 1,657.3 | 49.4  | 388.3 | 35.9 | 0.0   | 959.7   | 330.2 | 94.4    | 186.9   | 0.3 | 3.8  |
| 63 | Electro.   | ELECZCO-CO <sub>2</sub> MEA-MS-DEHYDR-SEP-DTG | Gasoline | 0.21 | 89.4  | 34,214.7 | 2,132.7 | 18.9  | 6,064.8  | 617.7   | 309.3   | 50.8  | 388.3 | 34.2 | 3.2   | 816.3   | 334.7 | 97.0    | 880.8   | 0.2 | 3.9  |
| 64 | Catalytic. | DHCO <sub>2</sub> MEOH-DEHYDR-SEP-DTG         | Gasoline | 0.21 | 91.6  | 35,056.5 | 649.7   | 14.6  | 1,378.5  | 140.4   | 70.3    | 52.0  | 388.3 | 51.9 | 0.0   | 207.7   | 162.8 | 127.9   | 147.3   | 0.1 | 4.0  |
| 65 | Catalytic. | RWGS-COPSA-DMES-SEP-DTG                       | Gasoline | 0.12 | 48.3  | 18,462.3 | 518.9   | 182.2 | 3,590.5  | 365.7   | 183.1   | 27.4  | 388.3 | 28.3 | 0.0   | 61.2    | 0.0   | 300.1   | 86.8    | 0.1 | 70.8 |
| 66 | Thermo.    | CR5-COPSA-DMES-SEP-DTG                        | Gasoline | 0.11 | 45.1  | 17,254.4 | 322.3   | 183.7 | 35,187.3 | 3,583.9 | 1,794.6 | 25.6  | 388.3 | 12.8 | 0.0   | 58.7    | 0.0   | 26.3    | 169.2   | 0.6 | 68.2 |
| 67 | Electro.   | ELECZCO-COPSA-DMES-SEP-DTG                    | Gasoline | 0.13 | 53.7  | 20,539.3 | 1,049.4 | 159.1 | 7,269.2  | 740.4   | 370.7   | 30.5  | 388.3 | 14.9 | 3.2   | 64.6    | 0.0   | 28.9    | 881.1   | 0.0 | 74.8 |
| 68 | Catalytic. | RWGS-CO <sub>2</sub> MEA-DMES-SEP-DTG         | Gasoline | 0.09 | 38.0  | 14,520.3 | 1,360.8 | 215.9 | 448.8    | 45.7    | 22.9    | 21.6  | 388.3 | 22.2 | 0.0   | 894.0   | 0.0   | 343.7   | 64.2    | 0.2 | 58.9 |
| 69 | Thermo.    | CR5-CO <sub>2</sub> MEA-DMES-SEP-DTG          | Gasoline | 0.11 | 45.1  | 17,264.3 | 1,056.4 | 195.7 | 31,787.4 | 3,237.6 | 1,621.2 | 25.6  | 388.3 | 12.8 | 0.0   | 820.8   | 0.0   | 26.3    | 156.5   | 0.1 | 52.8 |
| 70 | Electro.   | ELECZCO-CO <sub>2</sub> MEA-DMES-SEP-DTG      | Gasoline | 0.13 | 53.7  | 20,552.0 | 1,721.9 | 159.1 | 5,366.9  | 546.6   | 273.7   | 30.5  | 388.3 | 14.9 | 3.2   | 762.7   | 0.0   | 28.9    | 855.5   | 0.1 | 74.8 |
| 71 | Electro.   | ELECZFA-SEP                                   | FA       | 0.66 | 359.4 | 15,701.9 | 1,676.7 | 1.9   | 15,703.8 | 1,599.5 | 800.9   | 0.0   | 388.3 | 0.0  | 154.7 | 0.0     | 0.0   | 1,676.7 | 0.0     | 0.0 | 0.0  |
| 72 | Electro.   | ELECZETOH-SEP                                 | EtOH     | 0.08 | 47.9  | 11,728.2 | 3,170.9 | 1.8   | 25,240.6 | 2,570.8 | 1,287.3 | 658.1 | 388.3 | 0.0  | 233.1 | 0.0     | 0.0   | 0.0     | 3,152.9 | 0.0 | 17.9 |

Yield: calculated based on the main fuel product and material input.

CAP (ton/h or GGE/h): the capacity or production rate of each process.

ER (MWh): energy requirement that is energy required for process.

DCE (ton/h): direct CO<sub>2eq</sub> emission that was the CO<sub>2eq</sub> flow emit to the environment via vent-out gas, purge gas (obtained from process simulation).

TCI (M\$): total capital investment cost of plant.

ACC (M\$/y): annualized capital investment cost.

FOC (M\$/y): fixed operating cost (5.1 % of TCI).

Credit (M\$/y): achieved credits by byproducts (e.g., naphtha, extra-electricity,...)

Consumed utilities included low-pressure steam (LPS), high-pressure steam (HPS), fired heat (FH), electricity (Elec), cooling water (CW), refrigeration (Refri.).

#### **Technology abbreviations:**

Catalytic.: Catalytic CO<sub>2</sub> conversion, Thermo.: Thermochemical CO<sub>2</sub> energizing, Electro.: Electrochemical CO<sub>2</sub> reduction. RWGS: Reverse water-gas shift, DHM: Direct CO<sub>2</sub> hydrogenation to methanol, DHFT: Direct CO<sub>2</sub> hydrogenation to Fischer-Tropsch fuel, DHO: Direct CO<sub>2</sub> hydrogenation to light olefin, CR5: Thermochemical splitting via Counter-Rotating-Ring Receiver/Reactor/ Recuperator, ELECZCO: Electrochemical reduction to CO, ELECZETO: Electrochemical reduction to ethanol, ELECZefa: Electrochemical reduction to formic acid, MS: Methanol synthesis, FTS: Fischer-Tropsch synthesis, DMES: dimethylether synthesis, DEHYDR.: Dehydration of methanol to dimethylether, MTO: methanol-to-olefin, MTG: methanol-to-gasoline, DTG: DME-to-gasoline synthesis, COPSA: CO pressure swing adsorption, CO<sub>2</sub>MEA: CO<sub>2</sub> absorption by monoethanolamine, SEP: separation and purification.

**Table S4.4.** Energy flows in CO<sub>2</sub>-to-fuel pathways and energy efficiency of processes

| Pathway No. | Material input (kWh) | Utility (kWh) | Product (kWh) | Energy efficiency | Pathway No. | Material input (kWh) | Utility (kWh) | Product (kWh) | Energy efficiency |
|-------------|----------------------|---------------|---------------|-------------------|-------------|----------------------|---------------|---------------|-------------------|
| 1           | 1,954,949            | 759,090       | 1,596,334     | 58.82%            | 37          | 1,965,233            | 536,763       | 1,468,314     | 58.69%            |
| 2           | 1,773,197            | 678,590       | 1,619,826     | 66.07%            | 38          | 1,414,224            | 363,225       | 1,501,419     | 84.47%            |
| 3           | 1,588,332            | 990,442       | 1,632,304     | 63.30%            | 39          | 1,347,677            | 1,018,456     | 1,415,108     | 59.81%            |
| 4           | 1,965,233            | 707,536       | 1,657,374     | 62.01%            | 40          | 1,347,677            | 1,018,456     | 1,577,685     | 66.68%            |
| 5           | 1,414,224            | 566,732       | 1,638,635     | 82.72%            | 41          | 1,414,775            | 1,118,516     | 1,501,998     | 59.29%            |
| 6           | 1,347,677            | 1,168,759     | 1,688,296     | 67.09%            | 42          | 1,347,756            | 1,754,278     | 1,415,790     | 45.64%            |
| 7           | 1,928,039            | 1,699,077     | 1,617,341     | 44.59%            | 43          | 2,043,323            | 175,478       | 2,107,563     | 94.99%            |
| 8           | 1,414,775            | 1,322,082     | 1,639,351     | 59.90%            | 44          | 1,855,976            | 488,501       | 878,028       | 37.45%            |
| 9           | 1,347,756            | 1,872,567     | 1,686,066     | 52.36%            | 45          | 1,954,949            | 527,223       | 1,546,422     | 62.30%            |
| 10          | 2,043,323            | 383,196       | 1,727,549     | 71.19%            | 46          | 1,773,197            | 434,881       | 1,621,886     | 73.45%            |
| 11          | 2,136,859            | 1,216,837     | 1,040,332     | 31.02%            | 47          | 1,588,332            | 768,619       | 1,465,454     | 62.18%            |
| 12          | 1,580,019            | 1,032,166     | 1,032,218     | 39.52%            | 48          | 1,965,233            | 536,828       | 1,256,125     | 50.20%            |
| 13          | 1,482,149            | 1,690,850     | 1,056,674     | 33.30%            | 49          | 1,414,224            | 363,291       | 1,284,442     | 72.26%            |
| 14          | 2,126,457            | 2,146,253     | 1,010,100     | 23.64%            | 50          | 1,347,677            | 1,018,518     | 1,210,602     | 51.16%            |
| 15          | 1,580,649            | 1,775,886     | 1,032,673     | 30.77%            | 51          | 1,928,039            | 1,464,064     | 1,349,686     | 39.79%            |
| 16          | 1,482,346            | 2,363,853     | 1,057,218     | 27.49%            | 52          | 1,414,775            | 1,118,582     | 1,284,932     | 50.72%            |
| 17          | 2,149,861            | 437,801       | 1,506,707     | 58.23%            | 53          | 1,347,756            | 1,754,340     | 1,211,195     | 39.04%            |
| 18          | 1,954,949            | 991,641       | 1,580,650     | 49.07%            | 54          | 2,043,323            | 175,571       | 1,803,001     | 81.26%            |
| 19          | 1,773,197            | 914,563       | 1,603,906     | 54.59%            | 55          | 1,954,949            | 1,005,333     | 1,091,494     | 36.87%            |
| 20          | 1,588,332            | 1,228,234     | 1,616,260     | 52.50%            | 56          | 1,773,197            | 928,457       | 1,107,556     | 41.00%            |
| 21          | 1,965,233            | 948,979       | 1,641,083     | 51.52%            | 57          | 1,588,332            | 1,242,235     | 1,116,086     | 39.43%            |
| 22          | 1,414,224            | 805,445       | 1,622,529     | 66.87%            | 58          | 1,965,233            | 963,195       | 1,133,229     | 38.70%            |
| 23          | 1,347,677            | 1,414,707     | 1,671,708     | 55.36%            | 59          | 1,414,224            | 819,500       | 1,120,416     | 50.16%            |
| 24          | 1,928,039            | 1,934,689     | 1,601,449     | 37.93%            | 60          | 1,347,677            | 1,429,188     | 1,154,373     | 41.57%            |
| 25          | 1,414,775            | 1,560,899     | 1,623,243     | 49.90%            | 61          | 1,928,039            | 1,948,561     | 1,105,854     | 28.53%            |
| 26          | 1,347,756            | 2,118,190     | 1,669,498     | 44.07%            | 62          | 1,414,775            | 1,574,960     | 1,120,906     | 37.49%            |
| 27          | 2,043,323            | 634,863       | 1,710,576     | 58.43%            | 63          | 1,347,756            | 2,132,652     | 1,152,846     | 33.12%            |
| 28          | 1,116,714            | 511,125       | 1,580,650     | 88.83%            | 64          | 2,043,323            | 649,681       | 1,181,211     | 43.86%            |
| 29          | 504,911              | 315,049       | 1,603,906     | 93.93%            | 65          | 1,116,714            | 518,929       | 622,078       | 38.03%            |
| 30          | 588,163              | 1,040,736     | 1,002,213     | 56.29%            | 66          | 504,911              | 322,342       | 581,379       | 70.28%            |
| 31          | 873,616              | 1,354,693     | 708,513       | 29.09%            | 67          | 588,163              | 1,049,418     | 692,062       | 42.26%            |
| 32          | 505,226              | 1,049,054     | 842,401       | 49.58%            | 68          | 873,616              | 1,360,830     | 489,255       | 21.90%            |
| 33          | 587,809              | 1,713,242     | 1,002,830     | 39.87%            | 69          | 505,226              | 1,056,351     | 581,711       | 37.25%            |
| 34          | 1,954,949            | 527,144       | 1,807,655     | 72.83%            | 70          | 587,809              | 1,721,929     | 692,488       | 29.98%            |
| 35          | 1,773,197            | 541,427       | 1,895,856     | 81.91%            | 71          | 0                    | 1,676,745     | 529,067       | 31.55%            |
| 36          | 1,588,332            | 768,543       | 1,713,010     | 72.68%            | 72          | 0                    | 3,170,868     | 395,175       | 12.46%            |

Carbon and energy efficiency present how much carbon and energy are captured and stored in the products, which are expressed as follow:

$$\text{Carbon efficiency} = \frac{\text{Carbon in products}}{\text{Carbon in raw material}}, (\%) \quad (17)$$

$$\text{Energy efficiency} = \frac{\text{Heat of reaction of products}}{\text{Heat of reaction in raw material} + \text{Consumed energy as utility}}, (\%) \quad (18)$$

Fig. S4.1. ranks CO<sub>2</sub>-to-fuel pathways in terms of carbon efficiency, energy efficiency, unit production cost (UPC), and net CO<sub>2</sub>eq emission (NCE), in which the order is from good performance to bad performance.

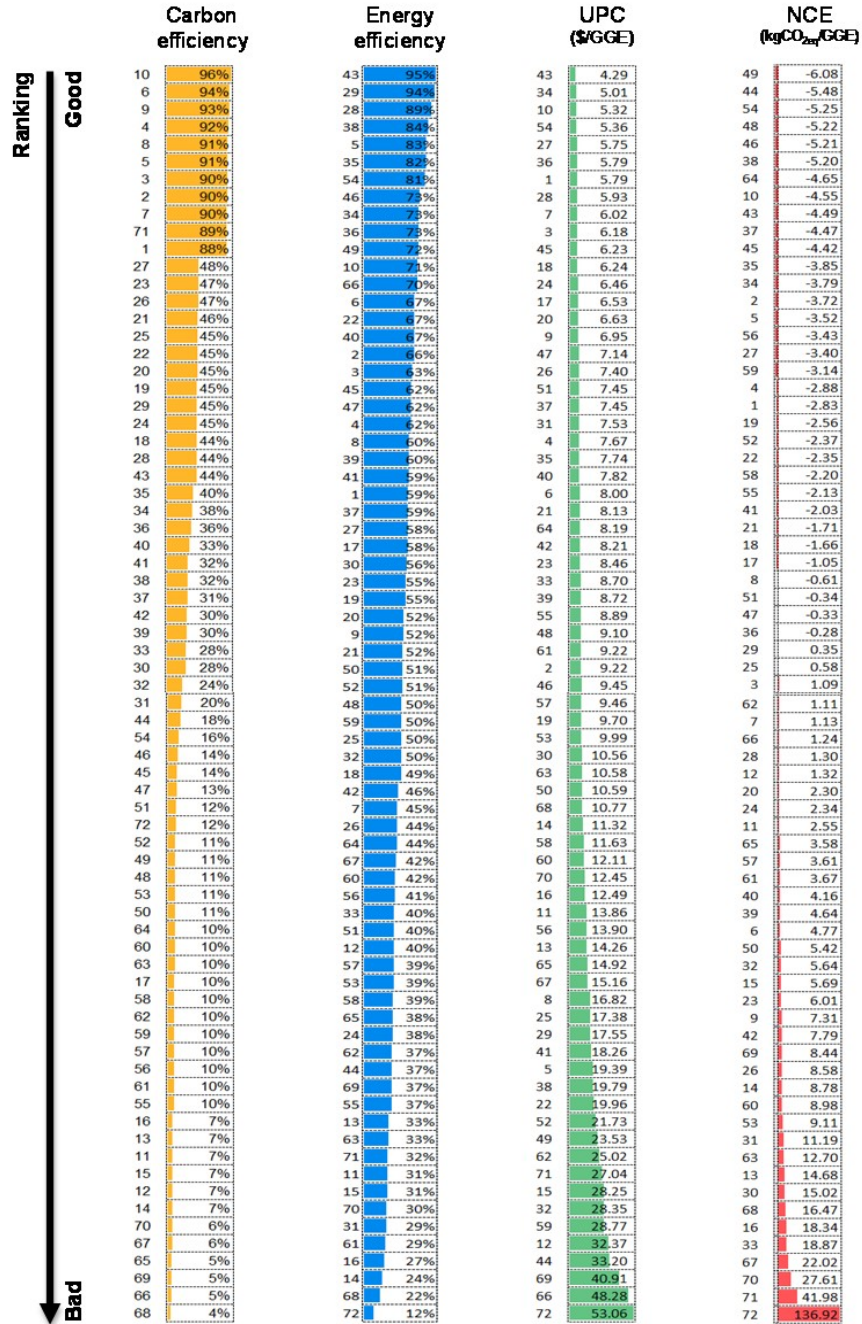

Fig. S4.1. Ranking CO<sub>2</sub>-to-fuel pathways by technical, economic and environmental performance

**Table S4.5.** CO<sub>2</sub>-based fuel's unit production cost and its breakdown (using green H<sub>2</sub>).

Unit: \$/GGE

| Pathway No. | Technology                                 | Product  | UPC   | ACC   | CO <sub>2</sub> | H <sub>2</sub> | Utility | FOC  |
|-------------|--------------------------------------------|----------|-------|-------|-----------------|----------------|---------|------|
| 1           | RWGS-MS-SEP                                | MeOH     | 5.83  | 0.18  | 0.29            | 4.65           | 0.63    | 0.09 |
| 2           | CR5-MS-SEP                                 | MeOH     | 9.26  | 2.90  | 0.28            | 4.16           | 0.47    | 1.45 |
| 3           | ELECZCO-MS-SEP                             | MeOH     | 6.22  | 0.85  | 0.28            | 3.69           | 0.96    | 0.43 |
| 4           | RWGS-COPSA-MS-SEP                          | MeOH     | 7.71  | 0.94  | 0.28            | 4.50           | 1.52    | 0.47 |
| 5           | CR5-COPSA-MS-SEP                           | MeOH     | 19.42 | 9.23  | 0.28            | 3.28           | 2.01    | 4.62 |
| 6           | ELECZCO-COPSA-MS-SEP                       | MeOH     | 8.02  | 1.85  | 0.27            | 3.03           | 1.94    | 0.93 |
| 7           | RWGS-CO <sub>2</sub> MEA-MS-SEP            | MeOH     | 6.06  | 0.18  | 0.28            | 4.53           | 0.97    | 0.09 |
| 8           | CR5-CO <sub>2</sub> MEA-MS-SEP             | MeOH     | 16.85 | 8.34  | 0.28            | 3.28           | 0.78    | 4.18 |
| 9           | ELECZCO-CO <sub>2</sub> MEA-MS-SEP         | MeOH     | 6.98  | 1.38  | 0.27            | 3.04           | 1.60    | 0.69 |
| 10          | DHM-SEP                                    | MeOH     | 5.36  | 0.18  | 0.27            | 4.49           | 0.33    | 0.09 |
| 11          | RWGS-COPSA-FTS-SEP                         | FT fuel  | 13.93 | 1.67  | 0.44            | 7.80           | 3.19    | 0.84 |
| 12          | CR5-COPSA-FTS-SEP                          | FT fuel  | 32.43 | 14.81 | 0.44            | 5.81           | 3.94    | 7.42 |
| 13          | ELECZCO-COPSA-FTS-SEP                      | FT fuel  | 14.30 | 3.13  | 0.43            | 5.33           | 3.85    | 1.57 |
| 14          | RWGS-CO <sub>2</sub> MEA-FTS-SEP           | FT fuel  | 11.40 | 0.43  | 0.45            | 7.99           | 2.30    | 0.22 |
| 15          | CR5-CO <sub>2</sub> MEA-FTS-SEP            | FT fuel  | 28.30 | 13.39 | 0.44            | 5.81           | 1.96    | 6.70 |
| 16          | ELECZCO-CO <sub>2</sub> MEA-FTS-SEP        | FT fuel  | 12.53 | 2.35  | 0.43            | 5.32           | 3.25    | 1.18 |
| 17          | DHFT-SEP                                   | FT fuel  | 6.58  | 0.25  | 0.30            | 5.42           | 0.49    | 0.13 |
| 18          | RWGS-MS-DEHYDR-SEP                         | DME      | 6.28  | 0.34  | 0.29            | 4.70           | 0.78    | 0.17 |
| 19          | CR5-MS-DEHYDR-SEP                          | DME      | 9.74  | 3.08  | 0.29            | 4.20           | 0.63    | 1.54 |
| 20          | ELECZCO-MS-DEHYDR-SEP                      | DME      | 6.66  | 1.02  | 0.28            | 3.73           | 1.12    | 0.51 |
| 21          | RWGS-COPSA-MS-DEHYDR-SEP                   | DME      | 8.17  | 1.11  | 0.28            | 4.55           | 1.68    | 0.55 |
| 22          | CR5-COPSA-MS-DEHYDR-SEP                    | DME      | 19.99 | 9.47  | 0.28            | 3.31           | 2.18    | 4.74 |
| 23          | ELECZCO-COPSA-MS-DEHYDR-SEP                | DME      | 8.49  | 2.03  | 0.27            | 3.06           | 2.11    | 1.01 |
| 24          | RWGS-CO <sub>2</sub> MEA-MS-DEHYDR-SEP     | DME      | 6.50  | 0.34  | 0.29            | 4.57           | 1.13    | 0.17 |
| 25          | CR5-CO <sub>2</sub> MEA-MS-DEHYDR-SEP      | DME      | 17.41 | 8.58  | 0.28            | 3.31           | 0.94    | 4.30 |
| 26          | ELECZCO-CO <sub>2</sub> MEA-MS-DEHYDR-SEP  | DME      | 7.43  | 1.55  | 0.27            | 3.07           | 1.76    | 0.78 |
| 27          | DHM-DEHYDR-SEP                             | DME      | 5.79  | 0.34  | 0.27            | 4.54           | 0.48    | 0.17 |
| 28          | RWGS-COPSA-DMES-SEP                        | DME      | 5.95  | 0.97  | 0.29            | 2.68           | 1.53    | 0.49 |
| 29          | CR5-COPSA-DMES-SEP                         | DME      | 17.56 | 9.41  | 0.29            | 1.20           | 1.96    | 4.71 |
| 30          | ELECZCO-COPSA-DMES-SEP                     | DME      | 10.58 | 3.10  | 0.46            | 2.23           | 3.24    | 1.55 |
| 31          | RWGS-CO <sub>2</sub> MEA-DMES-SEP          | DME      | 7.57  | 0.26  | 0.65            | 4.68           | 1.85    | 0.13 |
| 32          | CR5-CO <sub>2</sub> MEA-DMES-SEP           | DME      | 28.37 | 16.18 | 0.54            | 2.28           | 1.27    | 8.10 |
| 33          | ELECZCO-CO <sub>2</sub> MEA-DMES-SEP       | DME      | 8.72  | 2.29  | 0.46            | 2.23           | 2.60    | 1.15 |
| 34          | RWGS-MS-MTO                                | Olefin   | 5.05  | 0.15  | 0.25            | 4.11           | 0.46    | 0.08 |
| 35          | CR5-MS-MTO                                 | Olefin   | 7.77  | 2.47  | 0.24            | 3.55           | 0.28    | 1.24 |
| 36          | ELECZCO-MS-MTO                             | Olefin   | 5.82  | 0.81  | 0.27            | 3.52           | 0.82    | 0.40 |
| 37          | RWGS-COPSA-MS-MTO                          | Olefin   | 7.50  | 1.06  | 0.31            | 5.08           | 0.52    | 0.53 |
| 38          | CR5-COPSA-MS-MTO                           | Olefin   | 19.82 | 10.06 | 0.30            | 3.58           | 0.84    | 5.04 |
| 39          | ELECZCO-COPSA-MS-MTO                       | Olefin   | 8.75  | 2.20  | 0.32            | 3.62           | 1.51    | 1.10 |
| 40          | RWGS-CO <sub>2</sub> MEA-MS-MTO            | Olefin   | 7.85  | 1.98  | 0.29            | 3.24           | 1.35    | 0.99 |
| 41          | CR5-CO <sub>2</sub> MEA-MS-MTO             | Olefin   | 18.29 | 9.10  | 0.30            | 3.58           | 0.76    | 4.55 |
| 42          | ELECZCO-CO <sub>2</sub> MEA-MS-MTO         | Olefin   | 8.24  | 1.64  | 0.32            | 3.61           | 1.84    | 0.82 |
| 43          | DHM-MTO                                    | Olefin   | 4.32  | 0.15  | 0.22            | 3.68           | 0.20    | 0.07 |
| 44          | DHO-SEP                                    | Olefin   | 33.28 | 1.15  | 0.51            | 7.89           | 23.14   | 0.58 |
| 45          | RWGS-MS-MTG                                | Gasoline | 6.27  | 0.42  | 0.30            | 4.80           | 0.54    | 0.21 |
| 46          | CR5-MS-MTG                                 | Gasoline | 9.49  | 3.12  | 0.28            | 4.15           | 0.37    | 1.56 |
| 47          | ELECZCO-MS-MTG                             | Gasoline | 7.18  | 1.19  | 0.31            | 4.12           | 0.96    | 0.60 |
| 48          | RWGS-COPSA-MS-MTG                          | Gasoline | 9.16  | 1.50  | 0.36            | 5.94           | 0.61    | 0.75 |
| 49          | CR5-COPSA-MS-MTG                           | Gasoline | 23.56 | 12.02 | 0.36            | 4.18           | 0.99    | 6.02 |
| 50          | ELECZCO-COPSA-MS-MTG                       | Gasoline | 10.63 | 2.84  | 0.38            | 4.23           | 1.76    | 1.42 |
| 51          | RWGS-CO <sub>2</sub> MEA-MS-MTG            | Gasoline | 7.50  | 0.46  | 0.34            | 5.42           | 1.04    | 0.23 |
| 52          | CR5-CO <sub>2</sub> MEA-MS-MTG             | Gasoline | 21.77 | 10.89 | 0.36            | 4.18           | 0.88    | 5.45 |
| 53          | ELECZCO-CO <sub>2</sub> MEA-MS-MTG         | Gasoline | 10.03 | 2.18  | 0.38            | 4.23           | 2.16    | 1.09 |
| 54          | DHM-MTG                                    | Gasoline | 5.40  | 0.40  | 0.25            | 4.30           | 0.23    | 0.20 |
| 55          | RWGS-MS-DEHYDR-SEP-DTG                     | Gasoline | 8.95  | 0.49  | 0.41            | 6.66           | 1.14    | 0.25 |
| 56          | CR5-MS-DEHYDR-SEP-DTG                      | Gasoline | 13.96 | 4.42  | 0.41            | 6.00           | 0.92    | 2.21 |
| 57          | ELECZCO-MS-DEHYDR-SEP-DTG                  | Gasoline | 9.51  | 1.46  | 0.40            | 5.30           | 1.62    | 0.73 |
| 58          | RWGS-COPSA-MS-DEHYDR-SEP-DTG               | Gasoline | 11.69 | 1.59  | 0.40            | 6.48           | 2.43    | 0.80 |
| 59          | CR5-COPSA-MS-DEHYDR-SEP-DTG                | Gasoline | 28.81 | 13.64 | 0.41            | 4.76           | 3.17    | 6.83 |
| 60          | ELECZCO-COPSA-MS-DEHYDR-SEP-DTG            | Gasoline | 12.15 | 2.90  | 0.39            | 4.37           | 3.04    | 1.45 |
| 61          | RWGS-CO <sub>2</sub> MEA-MS-DEHYDR-SEP-DTG | Gasoline | 9.27  | 0.50  | 0.41            | 6.49           | 1.63    | 0.25 |
| 62          | CR5-CO <sub>2</sub> MEA-MS-DEHYDR-SEP-DTG  | Gasoline | 25.07 | 12.35 | 0.41            | 4.76           | 1.38    | 6.18 |

|    |                                               |          |       |       |      |      |       |       |
|----|-----------------------------------------------|----------|-------|-------|------|------|-------|-------|
| 63 | ELECZCO-CO <sub>2</sub> MEA-MS-DEHYDR-SEP-DTG | Gasoline | 10.62 | 2.22  | 0.39 | 4.36 | 2.54  | 1.11  |
| 64 | DHCO <sub>2</sub> MEOH-DEHYDR-SEP-DTG         | Gasoline | 8.24  | 0.49  | 0.38 | 6.42 | 0.71  | 0.25  |
| 65 | RWGS-COPSA-DMES-SEP-DTG                       | Gasoline | 14.99 | 2.45  | 0.73 | 6.73 | 3.86  | 1.22  |
| 66 | CR5-COPSA-DMES-SEP-DTG                        | Gasoline | 48.31 | 25.86 | 0.78 | 3.28 | 5.42  | 12.95 |
| 67 | ELECZCO-COPSA-DMES-SEP-DTG                    | Gasoline | 15.19 | 4.45  | 0.65 | 3.19 | 4.66  | 2.23  |
| 68 | RWGS-CO <sub>2</sub> MEA-DMES-SEP-DTG         | Gasoline | 10.83 | 0.39  | 0.92 | 6.67 | 2.66  | 0.19  |
| 69 | CR5-CO <sub>2</sub> MEA-DMES-SEP-DTG          | Gasoline | 40.94 | 23.34 | 0.78 | 3.28 | 1.85  | 11.68 |
| 70 | ELECZCO-CO <sub>2</sub> MEA-DMES-SEP-DTG      | Gasoline | 12.48 | 3.28  | 0.65 | 3.18 | 3.74  | 1.64  |
| 71 | ELECZFA-SEP                                   | FA       | 27.04 | 12.73 | 0.87 | 0.00 | 7.05  | 6.38  |
| 72 | ELECZETOH-SEP                                 | EtOH     | 53.06 | 24.20 | 1.02 | 0.00 | 15.70 | 12.12 |

Abbreviation: UPC: unit production cost, ACC: annualized capital cost, CO<sub>2</sub>, H<sub>2</sub>, Utility: variable operating costs including CO<sub>2</sub> and H<sub>2</sub>, utility cost, FOC: fixed operating cost.

**Table S4.6.** Net CO<sub>2eq</sub> emission (NCE) and its components (using green H<sub>2</sub>).

Unit: kgCO<sub>2eq</sub>/GGE

| Pathway No. | Technology                                | Product  | NCE   | CO <sub>2</sub> feed | Direct emission | Indirect emission |
|-------------|-------------------------------------------|----------|-------|----------------------|-----------------|-------------------|
| 1           | RWGS-MS-SEP                               | MeOH     | -2.83 | -8.20                | 0.78            | 4.59              |
| 2           | CR5-MS-SEP                                | MeOH     | -3.72 | -8.08                | 0.68            | 3.68              |
| 3           | ELECZCO-MS-SEP                            | MeOH     | 1.09  | -8.01                | 0.63            | 8.48              |
| 4           | RWGS-COPSA-MS-SEP                         | MeOH     | -2.88 | -7.89                | 0.54            | 4.48              |
| 5           | CR5-COPSA-MS-SEP                          | MeOH     | -3.52 | -7.98                | 0.60            | 3.87              |
| 6           | ELECZCO-COPSA-MS-SEP                      | MeOH     | 4.77  | -7.75                | 0.37            | 12.14             |
| 7           | RWGS-CO <sub>2</sub> MEA-MS-SEP           | MeOH     | 1.13  | -8.09                | 0.70            | 8.52              |
| 8           | CR5-CO <sub>2</sub> MEA-MS-SEP            | MeOH     | -0.61 | -7.98                | 0.60            | 6.77              |
| 9           | ELECZCO-CO <sub>2</sub> MEA-MS-SEP        | MeOH     | 7.31  | -7.76                | 0.38            | 14.69             |
| 10          | DHM-SEP                                   | MeOH     | -4.55 | -7.57                | 0.29            | 2.74              |
| 11          | RWGS-COPSA-FTS-SEP                        | FT fuel  | 2.55  | -12.57               | 0.21            | 14.92             |
| 12          | CR5-COPSA-FTS-SEP                         | FT fuel  | 1.32  | -12.67               | 0.24            | 13.75             |
| 13          | ELECZCO-COPSA-FTS-SEP                     | FT fuel  | 14.68 | -12.38               | 0.14            | 26.92             |
| 14          | RWGS-CO <sub>2</sub> MEA-FTS-SEP          | FT fuel  | 8.78  | -12.95               | 0.33            | 21.40             |
| 15          | CR5-CO <sub>2</sub> MEA-FTS-SEP           | FT fuel  | 5.69  | -12.67               | 0.24            | 18.12             |
| 16          | ELECZCO-CO <sub>2</sub> MEA-FTS-SEP       | FT fuel  | 18.34 | -12.37               | 0.14            | 30.57             |
| 17          | DHFT-SEP                                  | FT fuel  | -1.05 | -8.68                | 3.26            | 4.37              |
| 18          | RWGS-MS-DEHYDR-SEP                        | DME      | -1.66 | -8.28                | 0.78            | 5.83              |
| 19          | CR5-MS-DEHYDR-SEP                         | DME      | -2.56 | -8.16                | 0.69            | 4.91              |
| 20          | ELECZCO-MS-DEHYDR-SEP                     | DME      | 2.30  | -8.09                | 0.63            | 9.76              |
| 21          | RWGS-COPSA-MS-DEHYDR-SEP                  | DME      | -1.71 | -7.97                | 0.54            | 5.72              |
| 22          | CR5-COPSA-MS-DEHYDR-SEP                   | DME      | -2.35 | -8.06                | 0.61            | 5.10              |
| 23          | ELECZCO-COPSA-MS-DEHYDR-SEP               | DME      | 6.01  | -7.83                | 0.38            | 13.46             |
| 24          | RWGS-CO <sub>2</sub> MEA-MS-DEHYDR-SEP    | DME      | 2.34  | -8.17                | 0.71            | 9.80              |
| 25          | CR5-CO <sub>2</sub> MEA-MS-DEHYDR-SEP     | DME      | 0.58  | -8.06                | 0.61            | 8.03              |
| 26          | ELECZCO-CO <sub>2</sub> MEA-MS-DEHYDR-SEP | DME      | 8.58  | -7.84                | 0.38            | 16.03             |
| 27          | DHM-DEHYDR-SEP                            | DME      | -3.40 | -7.65                | 0.29            | 3.96              |
| 28          | RWGS-COPSA-DMES-SEP                       | DME      | 1.30  | -8.28                | 3.88            | 5.69              |
| 29          | CR5-COPSA-DMES-SEP                        | DME      | 0.35  | -8.16                | 3.86            | 4.65              |
| 30          | ELECZCO-COPSA-DMES-SEP                    | DME      | 15.02 | -13.05               | 5.35            | 22.73             |
| 31          | RWGS-CO <sub>2</sub> MEA-DMES-SEP         | DME      | 11.19 | -18.46               | 10.27           | 19.38             |
| 32          | CR5-CO <sub>2</sub> MEA-DMES-SEP          | DME      | 5.64  | -15.53               | 7.83            | 13.34             |
| 33          | ELECZCO-CO <sub>2</sub> MEA-DMES-SEP      | DME      | 18.87 | -13.05               | 5.35            | 26.57             |
| 34          | RWGS-MS-MTO                               | Olefin   | -3.79 | -7.24                | 0.21            | 3.24              |
| 35          | CR5-MS-MTO                                | Olefin   | -3.85 | -6.90                | 0.11            | 2.94              |
| 36          | ELECZCO-MS-MTO                            | Olefin   | -0.28 | -7.64                | 0.09            | 7.26              |
| 37          | RWGS-COPSA-MS-MTO                         | Olefin   | -4.47 | -8.91                | 0.12            | 4.32              |
| 38          | CR5-COPSA-MS-MTO                          | Olefin   | -5.20 | -8.71                | 0.15            | 3.36              |
| 39          | ELECZCO-COPSA-MS-MTO                      | Olefin   | 4.64  | -9.24                | 0.07            | 13.81             |
| 40          | RWGS-CO <sub>2</sub> MEA-MS-MTO           | Olefin   | 4.16  | -8.29                | 0.06            | 12.39             |
| 41          | CR5-CO <sub>2</sub> MEA-MS-MTO            | Olefin   | -2.03 | -8.71                | 0.15            | 6.53              |
| 42          | ELECZCO-CO <sub>2</sub> MEA-MS-MTO        | Olefin   | 7.79  | -9.24                | 0.07            | 16.96             |
| 43          | DHM-MTO                                   | Olefin   | -4.49 | -6.21                | 0.10            | 1.62              |
| 44          | DHO-SEP                                   | Olefin   | -5.48 | -14.90               | 1.50            | 7.91              |
| 45          | RWGS-MS-MTG                               | Gasoline | -4.42 | -8.46                | 0.25            | 3.79              |
| 46          | CR5-MS-MTG                                | Gasoline | -5.21 | -8.07                | 0.13            | 2.72              |
| 47          | ELECZCO-MS-MTG                            | Gasoline | -0.33 | -8.93                | 0.11            | 8.49              |

|    |                                               |          |        |        |       |        |
|----|-----------------------------------------------|----------|--------|--------|-------|--------|
| 48 | RWGS-COPSA-MS-MTG                             | Gasoline | -5.22  | -10.41 | 0.15  | 5.05   |
| 49 | CR5-COPSA-MS-MTG                              | Gasoline | -6.08  | -10.18 | 0.18  | 3.93   |
| 50 | ELECZCO-COPSA-MS-MTG                          | Gasoline | 5.42   | -10.81 | 0.08  | 16.15  |
| 51 | RWGS-CO <sub>2</sub> MEA-MS-MTG               | Gasoline | -0.34  | -9.69  | 0.24  | 9.11   |
| 52 | CR5-CO <sub>2</sub> MEA-MS-MTG                | Gasoline | -2.37  | -10.18 | 0.18  | 7.63   |
| 53 | ELECZCO-CO <sub>2</sub> MEA-MS-MTG            | Gasoline | 9.11   | -10.80 | 0.08  | 19.83  |
| 54 | DHM-MTG                                       | Gasoline | -5.25  | -7.26  | 0.11  | 1.90   |
| 55 | RWGS-MS-DEHYDR-SEP-DTG                        | Gasoline | -2.13  | -11.99 | 1.13  | 8.72   |
| 56 | CR5-MS-DEHYDR-SEP-DTG                         | Gasoline | -3.43  | -11.81 | 1.00  | 7.38   |
| 57 | ELECZCO-MS-DEHYDR-SEP-DTG                     | Gasoline | 3.61   | -11.72 | 0.92  | 14.41  |
| 58 | RWGS-COPSA-MS-DEHYDR-SEP-DTG                  | Gasoline | -2.20  | -11.54 | 0.79  | 8.56   |
| 59 | CR5-COPSA-MS-DEHYDR-SEP-DTG                   | Gasoline | -3.14  | -11.68 | 0.88  | 7.66   |
| 60 | ELECZCO-COPSA-MS-DEHYDR-SEP-DTG               | Gasoline | 8.98   | -11.33 | 0.55  | 19.76  |
| 61 | RWGS-CO <sub>2</sub> MEA-MS-DEHYDR-SEP-DTG    | Gasoline | 3.67   | -11.83 | 1.03  | 14.47  |
| 62 | CR5-CO <sub>2</sub> MEA-MS-DEHYDR-SEP-DTG     | Gasoline | 1.11   | -11.67 | 0.88  | 11.90  |
| 63 | ELECZCO-CO <sub>2</sub> MEA-MS-DEHYDR-SEP-DTG | Gasoline | 12.70  | -11.35 | 0.55  | 23.49  |
| 64 | DHCO <sub>2</sub> MEOH-DEHYDR-SEP-DTG         | Gasoline | -4.65  | -11.08 | 0.42  | 6.01   |
| 65 | RWGS-COPSA-DMES-SEP-DTG                       | Gasoline | 3.58   | -21.03 | 9.87  | 14.74  |
| 66 | CR5-COPSA-DMES-SEP-DTG                        | Gasoline | 1.24   | -22.50 | 10.65 | 13.10  |
| 67 | ELECZCO-COPSA-DMES-SEP-DTG                    | Gasoline | 22.02  | -18.90 | 7.74  | 33.18  |
| 68 | RWGS-CO <sub>2</sub> MEA-DMES-SEP-DTG         | Gasoline | 16.47  | -26.74 | 14.87 | 28.34  |
| 69 | CR5-CO <sub>2</sub> MEA-DMES-SEP-DTG          | Gasoline | 8.44   | -22.49 | 11.33 | 19.59  |
| 70 | ELECZCO-CO <sub>2</sub> MEA-DMES-SEP-DTG      | Gasoline | 27.61  | -18.89 | 7.74  | 38.75  |
| 71 | ELECZFA-SEP                                   | FA       | 41.98  | -24.73 | 0.12  | 66.58  |
| 72 | ELECZETOH-SEP                                 | EtOH     | 136.92 | -33.10 | 0.16  | 169.87 |

## S5. Optimization model for optimal pathway identification

To identify the optimal CO<sub>2</sub>-to-fuel pathway from an economic perspective, we developed a network optimization model using a mixed integer linear programming (MILP) technique based on the generated CCU4E superstructure along with associated parameters that was obtained through a process simulation.

**Objective function:** The object function identifies the optimal CO<sub>2</sub>-to-fuel pathway for each CO<sub>2</sub>-based fuel types, which produce fuel at minimum UPC among several pathways. This objective function is calculated by annual capital cost, operating cost, and annual production rate.

$$MinUPC_s = \sum_j X_{js} \left( \frac{\sum_j \alpha_j + \sum_j \psi_j + \sum_{i \in I^U} \varpi_i \gamma_{ij} + \sum_{i \in I^F} \xi_i F_{ij} - \sum_{i \in I^B} \pi_i S_{ij}}{\sum_{i \in I^P} S_{ij}} \right) \quad (17)$$

where  $X_{js}$  is the binary variable for the selection of pathway  $j$  in each fuel  $s$ ,  $\alpha_j$  is the total capital investment cost of pathway  $j$ ,  $\psi_j$  is the fixed operating cost factor of pathway  $j$ .  $\gamma_{ij}$  and  $F_{ij}$  is the amount of utilities and feestock, respectively.  $\varpi_i$  and  $\xi_i$  are the unit costs for utilities  $i \in I^U$  and feedstock  $i \in I^F$ , respectively.  $\delta_i$  is the annual production rate of final product  $i \in I^P$  and  $\pi_i$  is assumed unit price by-product  $i \in I^B$ .

### Constraints:

*Logistic constraints:* Only one pathway (the optimal one with the minimum UPC) should be selected toward each fuel  $s$ .

$$\sum_{j_1}^{j_n} X_{js} = 1$$

*Compound material balance:* the amount of feedstock and the production of a compound should be equal to the amount of product, by-product, and the consumption of compounds in pathway (a series of technologies):

$$F_i + \sum_{j \in J_i^+} \eta_{ij} Y_j = S_i - \sum_{j \in J_i^-} \eta_{ij} Y_j \quad \forall i \quad (18)$$



where  $F_i$  is the amount of feedstock  $i \in I^F$ ,  $\eta_{ij}$  is the yield of compound  $i$  in technology  $j$  ( $\eta_{ij} < 0$  for inputs and  $\eta_{ij} > 0$  for outputs),  $Y_j$  is the production level of technology  $j$ , and  $S_i$  is the amount of product  $i \in I^P$ , by-product  $i \in I^B$ .

*Capacity limits:* the total amount of the production each technology should be bounded by its capacity and the number of facilities:

$$Y_j \leq N_j \beta_j \quad (19)$$

where  $N_j$  is the number of technology  $j$ ,  $\beta_j$  is the capacity of technology  $j$ .

*Feed availability:* the amount of CO<sub>2</sub>  $i \in I^F$  for CO<sub>2</sub> utilization should be equal to its availability:

$$\sum_{i \in I^F} F_i = \rho \quad (20)$$

where  $\rho$  is the availability of CO<sub>2</sub>.

## S6. Analysis of CCU4E in different local scenarios

**Table S6.1.** Top country's share of CO<sub>2</sub> emissions <sup>51</sup>

|                   | % in 2018 | This study (Mt/y) |
|-------------------|-----------|-------------------|
| Global            | 100       | 1000              |
| China             | 29        | 290               |
| US                | 16        | 160               |
| Europe            | 11        | 110               |
| India             | 7         | 110               |
| Japan             | 4         | 40                |
| Korea             | 2         | 20                |
| Rest of the world | 31        | 270               |

**Table S6.2.** The unit price of black H<sub>2</sub> (estimated based on natural gas market) <sup>47,52-54</sup>

|        | Natural gas (\$/MMBTU) | Natural gas (\$/GJ) | Black H <sub>2</sub> * (\$/kg) |
|--------|------------------------|---------------------|--------------------------------|
| Global | 4.38                   | 4.15                | 2.7                            |
| USA    | 3.15                   | 2.99                | 2.3                            |
| Europe | 7.68                   | 7.28                | 4.1                            |
| China  | 8.1                    | 7.68                | 4.3                            |
| India  | 8.1                    | 7.68                | 4.3                            |
| Japan  | 8.1                    | 7.68                | 4.3                            |
| Korea  | 8.1                    | 7.68                | 4.3                            |

\* H<sub>2</sub> is assumed to produce via steam methane reforming integrated with CO<sub>2</sub> capture and storage <sup>40</sup>.

**Table S6.3.** UPC and NCE of CO<sub>2</sub>-based fuels using black/green H<sub>2</sub> by country

| Product  | Scenario             | UPC (\$/GGE) |      |        |       |       |       | NCE (kgCO <sub>2</sub> /GGE) |       |        |       |       |       |
|----------|----------------------|--------------|------|--------|-------|-------|-------|------------------------------|-------|--------|-------|-------|-------|
|          |                      | China        | USA  | Europe | India | Japan | Korea | China                        | USA   | Europe | India | Japan | Korea |
| MeOH     | Black H <sub>2</sub> | 5.37         | 3.15 | 5.14   | 5.33  | 5.31  | 5.34  | 0.00                         | -1.23 | -0.11  | 0.19  | -0.29 | -0.26 |
|          | Green H <sub>2</sub> | 4.87         | 4.41 | 6.58   | 4.07  | 9.52  | 7.42  | -0.67                        | -4.77 | -0.78  | -0.48 | -0.29 | -0.93 |
| FT fuel  | Black H <sub>2</sub> | 6.78         | 3.88 | 6.47   | 6.72  | 6.70  | 6.73  | 1.69                         | 2.94  | 1.43   | 2.19  | 0.96  | 1.05  |
|          | Green H <sub>2</sub> | 6.17         | 5.40 | 8.21   | 5.20  | 11.78 | 9.25  | 0.09                         | -1.33 | -0.17  | 0.59  | 0.96  | -0.56 |
| DME      | Black H <sub>2</sub> | 5.86         | 3.55 | 5.62   | 5.81  | 5.80  | 5.83  | 0.31                         | -0.04 | 0.17   | 0.58  | -0.09 | -0.04 |
|          | Green H <sub>2</sub> | 5.36         | 4.82 | 6.86   | 4.54  | 8.64  | 7.39  | -0.62                        | -3.62 | -0.77  | -0.35 | -0.09 | -0.98 |
| Olefin   | Black H <sub>2</sub> | 4.33         | 2.52 | 4.14   | 4.30  | 4.28  | 4.31  | -0.29                        | -1.77 | -0.46  | 0.03  | -0.77 | -0.71 |
|          | Green H <sub>2</sub> | 3.92         | 3.54 | 5.32   | 3.26  | 7.74  | 6.01  | -1.40                        | -4.67 | -1.57  | -1.08 | -0.77 | -1.82 |
| Gasoline | Black H <sub>2</sub> | 5.41         | 3.29 | 5.19   | 5.37  | 5.36  | 5.38  | -0.34                        | -2.07 | -0.54  | 0.04  | -0.90 | -0.84 |
|          | Green H <sub>2</sub> | 4.93         | 4.49 | 6.57   | 4.16  | 9.39  | 7.38  | -1.64                        | -5.46 | -1.84  | -1.26 | -0.90 | -2.13 |

## S7. Future estimation of black and green H<sub>2</sub>

Basically, green H<sub>2</sub> price was estimated based on the price of green electricity type (e.g., solar-based, wind-based, bioenergy) and technology development of water electrolyzer (e.g., alkaline – ALK, proton exchange membrane – PEM, solid oxide electrolyzer cell – SOEC). The price of various renewable-based electricity was assumed and estimated from references <sup>55–57</sup>, and presented in Table S7.1. Here, we also considered the potential development of electrolyzers with higher efficiency and lower capital cost, resulting in lower green H<sub>2</sub> price, in which the techno-economic characteristics was estimated and presented in Table S7. 2 – S7.4 <sup>55,58–60</sup>. Finally, green H<sub>2</sub> price was estimated and provided in Table S7.5.

**Table S7.1.** Estimated global renewable electricity price for 2020 – 2030

|                          | Unit   | 2020  | 2021  | 2022  | 2023  | 2024  | 2025  | 2026  | 2027  | 2028  | 2029  | 2030  |
|--------------------------|--------|-------|-------|-------|-------|-------|-------|-------|-------|-------|-------|-------|
| Solar Photovoltaic       | \$/kWh | 0.085 | 0.082 | 0.078 | 0.075 | 0.071 | 0.068 | 0.064 | 0.061 | 0.057 | 0.054 | 0.050 |
| Onshore wind             | \$/kWh | 0.056 | 0.054 | 0.053 | 0.051 | 0.050 | 0.048 | 0.046 | 0.045 | 0.043 | 0.042 | 0.040 |
| Offshore wind            | \$/kWh | 0.127 | 0.120 | 0.114 | 0.107 | 0.101 | 0.094 | 0.088 | 0.081 | 0.074 | 0.068 | 0.061 |
| Concentrated solar panel | \$/kWh | 0.185 | 0.177 | 0.168 | 0.160 | 0.151 | 0.143 | 0.134 | 0.126 | 0.117 | 0.109 | 0.100 |
| Bioenergy                | \$/kWh | 0.062 | 0.062 | 0.062 | 0.061 | 0.061 | 0.061 | 0.061 | 0.061 | 0.060 | 0.060 | 0.060 |
| Hydropower               | \$/kWh | 0.047 | 0.046 | 0.046 | 0.045 | 0.044 | 0.044 | 0.043 | 0.042 | 0.041 | 0.041 | 0.040 |
| Geothermal               | \$/kWh | 0.072 | 0.071 | 0.071 | 0.070 | 0.069 | 0.069 | 0.068 | 0.067 | 0.066 | 0.066 | 0.065 |
| Assumed for solar&wind   | \$/kWh | 0.071 | 0.068 | 0.065 | 0.063 | 0.060 | 0.058 | 0.055 | 0.053 | 0.050 | 0.048 | 0.045 |

**Table S7.2.** Assumption and estimated techno-economic characteristics for alkaline electrolyser (ALK) <sup>58</sup>

|                        | Unit                 | 2020   | 2021   | 2022   | 2023   | 2024   | 2025   | 2026   | 2027   | 2028   | 2029   | 2030   |
|------------------------|----------------------|--------|--------|--------|--------|--------|--------|--------|--------|--------|--------|--------|
| Efficiency (LHV)       | %                    | 67%    | 67%    | 67%    | 67%    | 67%    | 67%    | 67%    | 68%    | 68%    | 68%    | 68%    |
| Efficiency             | kWh/kgH <sub>2</sub> | 50     | 50     | 50     | 50     | 50     | 50     | 49     | 49     | 49     | 49     | 49     |
| Stack lifetime         | Operating hours      | 80000  | 81000  | 82000  | 83000  | 84000  | 85000  | 86000  | 87000  | 88000  | 89000  | 90000  |
| CAPEX                  | \$/kW                | 750    | 723    | 696    | 669    | 642    | 615    | 588    | 561    | 534    | 507    | 480    |
| OPEX                   |                      |        |        |        |        |        |        |        |        |        |        |        |
| Stack replacement cost | \$/kW                | 340    | 723    | 696    | 669    | 642    | 615    | 588    | 561    | 534    | 507    | 215    |
| Stack replacement      | % of stack           | 10%    | 10%    | 10%    | 10%    | 10%    | 9%     | 9%     | 9%     | 9%     | 9%     | 9%     |
| OPEX-FC                | % of CAPEX           | 2%     | 2%     | 2%     | 2%     | 2%     | 2%     | 2%     | 2%     | 2%     | 2%     | 2%     |
| Capacity               | kWh                  | 20,000 | 20,000 | 20,000 | 20,000 | 20,000 | 20,000 | 20,000 | 20,000 | 20,000 | 20,000 | 20,000 |
| Operability            | h/y                  | 8,000  | 8,000  | 8,000  | 8,000  | 8,000  | 8,000  | 8,000  | 8,000  | 8,000  | 8,000  | 8,000  |

**Table S7.3.** Assumption and estimated techno-economic characteristics for proton exchange membrane electrolyser (PEM) <sup>58</sup>

|                        | Unit                 | 2020   | 2021   | 2022   | 2023   | 2024   | 2025   | 2026   | 2027   | 2028   | 2029   | 2030   |
|------------------------|----------------------|--------|--------|--------|--------|--------|--------|--------|--------|--------|--------|--------|
| Efficiency (LHV)       | %                    | 58%    | 59%    | 60%    | 60%    | 61%    | 62%    | 63%    | 63%    | 64%    | 65%    | 66%    |
| Efficiency             | kWh/kgH <sub>2</sub> | 57     | 57     | 56     | 55     | 55     | 54     | 53     | 53     | 52     | 51     | 51     |
| Stack lifetime         | Operating hours      | 40000  | 43500  | 47000  | 50500  | 54000  | 57500  | 61000  | 64500  | 68000  | 71500  | 75000  |
| CAPEX                  | \$/kW                | 1,200  | 1,150  | 1,100  | 1,050  | 1,000  | 950    | 900    | 850    | 800    | 750    | 700    |
| OPEX                   |                      |        |        |        |        |        |        |        |        |        |        |        |
| Stack replacement cost | \$/kW                | 420    | 399    | 378    | 357    | 336    | 315    | 294    | 273    | 252    | 231    | 210    |
| Stack replacement      | % of stack           | 20%    | 18%    | 17%    | 16%    | 15%    | 14%    | 13%    | 12%    | 12%    | 11%    | 11%    |
| OPEX-FC                | % of CAPEX           | 2%     | 2%     | 2%     | 2%     | 2%     | 2%     | 2%     | 2%     | 2%     | 2%     | 2%     |
| Capacity               | kWh                  | 20,000 | 20,000 | 20,000 | 20,000 | 20,000 | 20,000 | 20,000 | 20,000 | 20,000 | 20,000 | 20,000 |
| Operability            | h/y                  | 8,000  | 8,000  | 8,000  | 8,000  | 8,000  | 8,000  | 8,000  | 8,000  | 8,000  | 8,000  | 8,000  |

**Table S7.4.** Assumption and estimated techno-economic characteristics for solid oxide electrolyzer cell (SOEC) <sup>58</sup>

|                        | Unit                 | 2020   | 2021   | 2022   | 2023   | 2024   | 2025   | 2026   | 2027   | 2028   | 2029   | 2030   |
|------------------------|----------------------|--------|--------|--------|--------|--------|--------|--------|--------|--------|--------|--------|
| Efficiency (LHV)       | %                    | 78%    | 78%    | 78%    | 78%    | 79%    | 79%    | 79%    | 80%    | 80%    | 80%    | 81%    |
| Efficiency             | kWh/kgH <sub>2</sub> | 43     | 43     | 43     | 42     | 42     | 42     | 42     | 42     | 42     | 42     | 41     |
| Stack lifetime         | Operating hours      | 20,000 | 22,000 | 24,000 | 26,000 | 28,000 | 30,000 | 32,000 | 34,000 | 36,000 | 38,000 | 40,000 |
| CAPEX                  | \$/kW                | 4,200  | 3,960  | 3,720  | 3,480  | 3,240  | 3,000  | 2,760  | 2,520  | 2,280  | 2,040  | 1,800  |
| OPEX                   |                      |        |        |        |        |        |        |        |        |        |        |        |
| Stack replacement cost | \$/kW                | 2,100  | 1,980  | 1,860  | 1,740  | 1,620  | 1,500  | 1,380  | 1,260  | 1,140  | 1,020  | 900    |
| Stack replacement      | % of stack           | 40%    | 36%    | 33%    | 31%    | 29%    | 27%    | 25%    | 24%    | 22%    | 21%    | 20%    |
| OPEX-FC                | % of CAPEX           | 2%     | 2%     | 2%     | 2%     | 2%     | 2%     | 2%     | 2%     | 2%     | 2%     | 2%     |
| Capacity               | kWh                  | 20,000 | 20,000 | 20,000 | 20,000 | 20,000 | 20,000 | 20,000 | 20,000 | 20,000 | 20,000 | 20,000 |
| Operability            | h/y                  | 8,000  | 8,000  | 8,000  | 8,000  | 8,000  | 8,000  | 8,000  | 8,000  | 8,000  | 8,000  | 8,000  |

**Table S7.5.** Estimated of green hydrogen price in 2020 – 2030

| Electrolyzer type | Energy source      | 2020   | 2021   | 2022   | 2023   | 2024   | 2025   | 2026  | 2027  | 2028  | 2029  | 2030  |
|-------------------|--------------------|--------|--------|--------|--------|--------|--------|-------|-------|-------|-------|-------|
| ALK               | SolarPV            | 5.041  | 5.068  | 4.840  | 4.613  | 4.388  | 4.164  | 3.942 | 3.722 | 3.502 | 3.284 | 2.924 |
|                   | Onshore wind       | 3.589  | 3.714  | 3.584  | 3.454  | 3.326  | 3.199  | 3.073 | 2.948 | 2.823 | 2.700 | 2.434 |
|                   | Offshore wind      | 7.144  | 7.013  | 6.627  | 6.243  | 5.862  | 5.483  | 5.106 | 4.731 | 4.358 | 3.987 | 3.474 |
|                   | CSP                | 10.049 | 9.815  | 9.326  | 8.841  | 8.358  | 7.878  | 7.401 | 6.926 | 6.454 | 5.984 | 5.372 |
|                   | Bioenergy          | 3.890  | 4.084  | 4.022  | 3.962  | 3.902  | 3.843  | 3.784 | 3.727 | 3.669 | 3.613 | 3.413 |
|                   | Hydropower         | 3.138  | 3.309  | 3.225  | 3.141  | 3.058  | 2.976  | 2.895 | 2.815 | 2.735 | 2.656 | 2.434 |
|                   | Geothermal         | 4.390  | 4.558  | 4.471  | 4.384  | 4.299  | 4.214  | 4.130 | 4.047 | 3.965 | 3.883 | 3.658 |
| PEM               | SolarPV            | 6.532  | 6.132  | 5.753  | 5.392  | 5.047  | 4.716  | 4.397 | 4.090 | 3.793 | 3.505 | 3.226 |
|                   | Onshore wind       | 4.867  | 4.596  | 4.343  | 4.104  | 3.879  | 3.664  | 3.459 | 3.263 | 3.075 | 2.893 | 2.718 |
|                   | Offshore wind      | 8.944  | 8.339  | 7.760  | 7.204  | 6.668  | 6.152  | 5.652 | 5.168 | 4.698 | 4.242 | 3.798 |
|                   | CSP                | 12.274 | 11.517 | 10.790 | 10.090 | 9.414  | 8.760  | 8.127 | 7.512 | 6.914 | 6.334 | 5.768 |
|                   | Bioenergy          | 5.212  | 5.016  | 4.835  | 4.668  | 4.512  | 4.365  | 4.227 | 4.095 | 3.970 | 3.850 | 3.735 |
|                   | Hydropower         | 4.351  | 4.137  | 3.940  | 3.756  | 3.584  | 3.422  | 3.268 | 3.121 | 2.981 | 2.847 | 2.718 |
|                   | Geothermal         | 5.786  | 5.554  | 5.339  | 5.138  | 4.949  | 4.770  | 4.600 | 4.437 | 4.282 | 4.133 | 3.989 |
| SOEC              | SolarPV            | 10.913 | 9.922  | 9.046  | 8.258  | 7.540  | 6.879  | 6.264 | 5.687 | 5.143 | 4.626 | 4.133 |
|                   | Onshore wind       | 9.667  | 8.762  | 7.972  | 7.269  | 6.635  | 6.057  | 5.525 | 5.030 | 4.568 | 4.132 | 3.720 |
|                   | Offshore wind      | 12.717 | 11.588 | 10.575 | 9.650  | 8.797  | 8.001  | 7.253 | 6.544 | 5.868 | 5.221 | 4.599 |
|                   | CSP                | 15.209 | 13.988 | 12.883 | 11.869 | 10.925 | 10.040 | 9.203 | 8.406 | 7.643 | 6.910 | 6.202 |
|                   | Bioenergy          | 9.924  | 9.079  | 8.347  | 7.702  | 7.126  | 6.605  | 6.129 | 5.691 | 5.284 | 4.904 | 4.547 |
|                   | Hydropower         | 9.280  | 8.416  | 7.665  | 7.001  | 6.406  | 5.867  | 5.374 | 4.917 | 4.493 | 4.095 | 3.720 |
|                   | Geothermal         | 10.354 | 9.486  | 8.731  | 8.063  | 7.464  | 6.921  | 6.423 | 5.963 | 5.534 | 5.133 | 4.754 |
| ALK               | SolarPV&wind-based | 4.315  | 4.391  | 4.212  | 4.034  | 3.857  | 3.682  | 3.508 | 3.335 | 3.163 | 2.992 | 2.679 |

Also, black H<sub>2</sub> was assumed to be produced via steam methane reforming with carbon capture, in which H<sub>2</sub> price depends on natural gas price, as followed reference <sup>61</sup>, extracted and shown in Fig. S7.1. Noted that future of natural gas price is unstable and not readily available, we estimated based on three big market of natural gas (USA, EU, and Asia) <sup>52,53,62,63</sup>, as shown in Table S7.6.

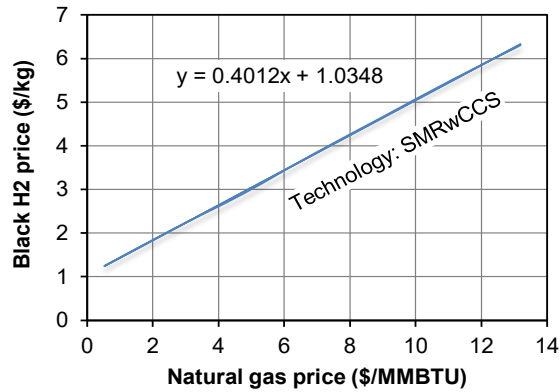

**Fig. S7.1.** Correlation of H<sub>2</sub> price and natural gas price via technology of steam methane reforming integrated with carbon capture process (SMRwCCS).

**Table S7.6.** Estimation for natural gas prices and black H<sub>2</sub> price

| Natural gas price (\$/MMBTU):       |                          | 2018 | 2019 | 2020 | 2021 | 2022 | 2023  | 2024  | 2025  | 2026  | 2027  | 2028  | 2029  | 2030  |
|-------------------------------------|--------------------------|------|------|------|------|------|-------|-------|-------|-------|-------|-------|-------|-------|
| Market                              | Assumption               |      |      |      |      |      |       |       |       |       |       |       |       |       |
| USA                                 | Pessimistic (World Bank) | 3.15 | 2.50 | 2.70 | 2.81 | 2.92 | 3.04  | 3.16  | 3.29  | 3.42  | 3.56  | 3.70  | 3.85  | 4.00  |
| Europe                              | Medium (World Bank)      | 7.68 | 4.50 | 4.50 | 4.70 | 4.92 | 5.14  | 5.37  | 5.61  | 5.87  | 6.13  | 6.41  | 6.70  | 7.00  |
| Asia                                | Optimistic (World Bank)  | 8.10 | 8.10 | 8.11 | 8.15 | 8.19 | 8.23  | 8.27  | 8.31  | 8.35  | 8.39  | 8.43  | 8.47  | 8.51  |
| USA                                 | Pessimistic (WEO)        | 3.15 | 2.66 | 2.57 | 2.59 | 2.61 | 2.63  | 2.65  | 2.67  | 2.69  | 2.71  | 2.73  | 2.75  | 2.77  |
| Europe                              | Medium (WEO)             | 7.68 | 4.77 | 5.96 | 5.89 | 5.81 | 5.74  | 5.67  | 5.60  | 5.53  | 5.46  | 5.39  | 5.33  | 5.26  |
| Asia                                | Optimistic (WEO)         | 8.10 | 5.73 | 6.64 | 6.64 | 6.65 | 6.65  | 6.66  | 6.67  | 6.67  | 6.68  | 6.68  | 6.69  | 6.69  |
| USA                                 | Pessimistic (EIA)        | 3.15 | 3.29 | 3.43 | 3.58 | 3.74 | 3.91  | 4.08  | 4.26  | 4.45  | 4.64  | 4.85  | 5.06  | 5.28  |
| Europe                              | Medium (EIA)             | 7.68 | 8.02 | 8.37 | 8.74 | 9.12 | 9.53  | 9.95  | 10.38 | 10.84 | 11.32 | 11.82 | 12.34 | 12.88 |
| Asia                                | Optimistic (EIA)         | 8.10 | 8.46 | 8.83 | 9.22 | 9.62 | 10.05 | 10.49 | 10.95 | 11.43 | 11.94 | 12.46 | 13.01 | 13.58 |
| Black H <sub>2</sub> price (\$/kg): |                          | 2018 | 2019 | 2020 | 2021 | 2022 | 2023  | 2024  | 2025  | 2026  | 2027  | 2028  | 2029  | 2030  |
| Market                              | Assumption               |      |      |      |      |      |       |       |       |       |       |       |       |       |
| USA                                 | Pessimistic (World Bank) | 2.30 | 2.04 | 2.12 | 2.16 | 2.21 | 2.25  | 2.30  | 2.35  | 2.41  | 2.46  | 2.52  | 2.58  | 2.64  |
| Europe                              | Medium (World Bank)      | 4.12 | 2.84 | 2.84 | 2.92 | 3.01 | 3.10  | 3.19  | 3.29  | 3.39  | 3.49  | 3.61  | 3.72  | 3.84  |
| Asia                                | Optimistic (World Bank)  | 4.28 | 4.29 | 4.29 | 4.30 | 4.32 | 4.34  | 4.35  | 4.37  | 4.38  | 4.40  | 4.42  | 4.43  | 4.45  |
| USA                                 | Pessimistic (WEO)        | 2.30 | 2.10 | 2.07 | 2.07 | 2.08 | 2.09  | 2.10  | 2.11  | 2.11  | 2.12  | 2.13  | 2.14  | 2.15  |
| Europe                              | Medium (WEO)             | 4.12 | 2.95 | 3.43 | 3.40 | 3.37 | 3.34  | 3.31  | 3.28  | 3.25  | 3.23  | 3.20  | 3.17  | 3.15  |
| Asia                                | Optimistic (WEO)         | 4.28 | 3.33 | 3.70 | 3.70 | 3.70 | 3.70  | 3.71  | 3.71  | 3.71  | 3.71  | 3.71  | 3.72  | 3.72  |
| USA                                 | Pessimistic (EIA)        | 2.30 | 2.35 | 2.41 | 2.47 | 2.54 | 2.60  | 2.67  | 2.74  | 2.82  | 2.90  | 2.98  | 3.06  | 3.15  |
| Europe                              | Medium (EIA)             | 4.12 | 4.25 | 4.39 | 4.54 | 4.70 | 4.86  | 5.02  | 5.20  | 5.38  | 5.58  | 5.78  | 5.98  | 6.20  |
| Asia                                | Optimistic (EIA)         | 4.28 | 4.43 | 4.58 | 4.73 | 4.90 | 5.07  | 5.24  | 5.43  | 5.62  | 5.82  | 6.03  | 6.25  | 6.48  |

**Table S7.7.** Estimated CO<sub>2</sub>-based fuel UPC in short-term future

|      | MeOH  |      |      | FT    |       |      | DME   |      |      | Olefin |      |      | Gasoline |      |      |
|------|-------|------|------|-------|-------|------|-------|------|------|--------|------|------|----------|------|------|
|      | 2020  | 2025 | 2030 | 2020  | 2025  | 2030 | 2020  | 2025 | 2030 | 2020   | 2025 | 2030 | 2020     | 2025 | 2030 |
| Data | 5.96  | 5.08 | 3.82 | 7.32  | 6.25  | 4.73 | 6.41  | 5.51 | 4.24 | 4.82   | 4.09 | 3.06 | 5.98     | 5.13 | 3.93 |
|      | 4.50  | 4.10 | 3.33 | 5.55  | 5.07  | 4.00 | 4.92  | 4.52 | 3.74 | 3.61   | 3.29 | 3.00 | 4.57     | 4.20 | 3.45 |
|      | 8.09  | 6.41 | 4.38 | 9.88  | 7.86  | 5.41 | 8.55  | 6.86 | 4.81 | 6.56   | 5.18 | 3.52 | 8.02     | 6.41 | 4.46 |
|      | 11.03 | 8.83 | 6.30 | 13.43 | 10.78 | 7.72 | 11.52 | 9.30 | 6.74 | 8.97   | 7.17 | 5.09 | 10.83    | 8.73 | 6.30 |
|      | 4.80  | 4.75 | 4.32 | 5.91  | 5.85  | 5.33 | 5.23  | 5.18 | 4.74 | 3.86   | 3.82 | 3.47 | 4.86     | 4.82 | 4.40 |
|      | 4.04  | 3.88 | 3.33 | 5.00  | 4.80  | 4.14 | 4.46  | 4.30 | 3.74 | 3.24   | 3.11 | 2.66 | 4.14     | 3.98 | 3.45 |
|      | 5.31  | 5.13 | 4.57 | 6.52  | 6.31  | 5.63 | 5.74  | 5.56 | 4.99 | 4.28   | 4.13 | 3.67 | 5.35     | 5.18 | 4.64 |
|      | 7.47  | 5.64 | 4.13 | 9.14  | 6.92  | 5.10 | 7.93  | 6.07 | 4.55 | 6.06   | 4.55 | 3.31 | 7.43     | 5.67 | 4.22 |
|      | 5.79  | 4.57 | 3.61 | 7.11  | 5.64  | 4.48 | 6.23  | 5.00 | 4.03 | 4.67   | 3.68 | 2.89 | 5.81     | 4.65 | 3.73 |
|      | 9.91  | 7.09 | 4.71 | 12.08 | 8.67  | 5.80 | 10.39 | 7.54 | 5.14 | 8.05   | 5.74 | 3.79 | 9.76     | 7.06 | 4.78 |

|      |       |       |      |       |       |      |       |       |      |       |      |      |       |       |      |
|------|-------|-------|------|-------|-------|------|-------|-------|------|-------|------|------|-------|-------|------|
|      | 13.28 | 9.73  | 6.70 | 16.14 | 11.86 | 8.20 | 13.79 | 10.21 | 7.15 | 10.82 | 7.90 | 5.42 | 12.99 | 9.59  | 6.69 |
|      | 6.14  | 5.28  | 4.64 | 7.53  | 6.49  | 5.72 | 6.58  | 5.72  | 5.07 | 4.96  | 4.26 | 3.74 | 6.15  | 5.33  | 4.71 |
|      | 5.27  | 4.33  | 3.61 | 6.47  | 5.34  | 4.48 | 5.70  | 4.75  | 4.03 | 4.25  | 3.48 | 2.89 | 5.31  | 4.41  | 3.73 |
|      | 7.00  | 5.69  | 4.90 | 8.00  | 6.99  | 6.03 | 7.00  | 6.13  | 5.33 | 5.00  | 4.59 | 3.95 | 7.00  | 5.72  | 4.96 |
|      | 11.90 | 7.82  | 5.05 | 14.48 | 9.56  | 6.21 | 12.40 | 8.28  | 5.48 | 9.69  | 6.34 | 4.07 | 11.67 | 7.76  | 5.10 |
|      | 10.64 | 6.99  | 4.63 | 12.96 | 8.56  | 5.70 | 11.13 | 7.44  | 5.06 | 8.65  | 5.66 | 3.72 | 10.46 | 6.97  | 4.70 |
|      | 13.73 | 8.96  | 5.52 | 16.68 | 10.93 | 6.78 | 14.25 | 9.43  | 5.95 | 11.18 | 7.27 | 4.45 | 13.42 | 8.85  | 5.55 |
|      | 16.25 | 11.02 | 7.14 | 19.73 | 13.42 | 8.73 | 16.79 | 11.51 | 7.59 | 13.25 | 8.96 | 5.78 | 15.84 | 10.83 | 7.11 |
|      | 10.90 | 7.55  | 5.46 | 13.28 | 9.23  | 6.71 | 11.39 | 8.00  | 5.90 | 8.87  | 6.12 | 4.41 | 10.71 | 7.50  | 5.50 |
|      | 10.25 | 6.80  | 4.63 | 12.49 | 8.33  | 5.70 | 10.74 | 7.25  | 5.06 | 8.33  | 5.50 | 3.72 | 10.09 | 6.78  | 4.70 |
|      | 11.34 | 7.87  | 5.67 | 13.80 | 9.61  | 6.97 | 11.83 | 8.33  | 6.11 | 9.22  | 6.38 | 4.58 | 11.13 | 7.80  | 5.70 |
| Mean | 8.74  | 6.55  | 4.78 | 10.64 | 8.02  | 5.88 | 9.19  | 6.99  | 5.21 | 7.06  | 5.30 | 3.87 | 8.64  | 6.54  | 4.85 |

## Reference

- 1 Global CCS Institute & Parsons Brinckerhoff, *Technology*.
- 2 IEA (2019), *Putting CO<sub>2</sub> to Use*, Paris.
- 3 IEA (2019), *Transforming Industry through CCUS*, .
- 4 L. M. Bert Metz, Ogunlade Davidson, Heleen de Coninck, Manuela Loos, *The IPCC special report on carbon dioxide capture and storage*, Cambridge University Press, 2005.
- 5 C. Hepburn, E. Adlen, J. Beddington, E. A. Carter, S. Fuss, N. Mac Dowell, J. C. Minx, P. Smith and C. K. Williams, *Nature*, 2019, **575**, 87–97.
- 6 R. Chauvy, N. Meunier, D. Thomas and G. De Weireld, *Appl. Energy*, 2019, **236**, 662–680.
- 7 World Oil, IEA predicts global oil demand will level off around 2030.
- 8 Freedonia, World Biofuels, <https://www.freedoniagroup.com/industry-study/world-biofuels-3179.htm>, (accessed 3 February 2020).
- 9 M. Aresta, A. Dibenedetto and E. Quaranta, *J. Catal.*, , DOI:10.1016/j.jcat.2016.04.003.
- 10 S. Kim and J. Kim, *Fuel*, 2020, **266**, 117093.
- 11 K. M. Vanden Bussche and G. F. Froment, *J. Catal.*, 1996, **161**, 1–10.
- 12 S. Han, S. Kim, Y. T. Kim, G. Kwak and J. Kim, *Energy Convers. Manag.*, 2019, **187**, 1–14.
- 13 C. Mevawala, Y. Jiang and D. Bhattacharyya, *Appl. Energy*, 2017, **204**, 163–180.
- 14 Z. Nie, H. Liu, D. Liu, W. Ying and D. Fang, *J. Nat. Gas Chem*.
- 15 T. N. Do and J. Kim, *J. CO<sub>2</sub> Util.*, 2019, **33**, 461–472.
- 16 C. Zhang, R. Gao, K.-W. Jun, S. K. Kim, S.-M. Hwang, H.-G. Park and G. Guan, *J. CO<sub>2</sub> Util.*, 2019, **34**, 293–302.
- 17 T. N. Do and J. Kim, *Energy Convers. Manag.*, 2020, **214**, 112866.
- 18 S. Najari, G. Gróf, S. Saeidi and F. Gallucci, *Int. J. Hydrogen Energy*, 2019, **44**, 4630–4649.
- 19 D. Xiang, S. Yang and Y. Qian, *Energy Convers. Manag.*, 2016, **110**, 33–41.
- 20 J. Kim, S. M. Sen and C. T. Maravelias, *Energy Environ. Sci.*, 2013, **6**, 1093–1104.
- 21 S. Jones and Y. Zhu, in *Industrial Chemistry*, Apple Academic Press, 2011, pp. 242–262.
- 22 F. Trippe, M. Fröhling, F. Schultmann, R. Stahl, E. Henrich and A. Dalai, *Fuel Process. Technol.*, 2013, **106**, 577–586.
- 23 G. Liu and E. D. Larson, in *Energy Procedia*, 2014, vol. 63.
- 24 C. J. Kulik, M. Gogate and C. J. Kulik, *Fuel Sci. Technol. Int.*, , DOI:10.1080/08843759508947721.

- 25 J. Kim, C. A. Henao, T. A. Johnson, D. E. Dedrick, J. E. Miller, E. B. Stechel and C. T. Maravelias, *Energy Environ. Sci.*, 2011, **4**, 3122–3132.
- 26 J. Kim, T. A. Johnson, J. E. Miller, E. B. Stechel and C. T. Maravelias, *Energy Environ. Sci.*, 2012, **5**, 8417–8429.
- 27 J. M. Spurgeon and B. Kumar, *Energy Environ. Sci.*, 2018, **11**, 1536–1551.
- 28 B. James, W. Colella, J. Moton, G. Saur and T. Ramsden, *PEM Electrolysis H<sub>2</sub>A Prod. Case Study Doc.*, 2013, 1–27.
- 29 R. Kungas, *J. Electrochem. Soc.*, 2020, **167**, 044508.
- 30 R. Davis, A. Aden and P. T. Pienkos, *Appl. Energy*, 2011, **88**, 3524–3531.
- 31 F. R. Soares, G. Martins and E. S. M. Seo, *Environ. Technol. (United Kingdom)*, 2013, **34**, 1777–1781.
- 32 Y. Il Lim, J. Choi, H. M. Moon and G. H. Kim, *Korean Chem. Eng. Res.*, 2016, **54**, 320–331.
- 33 Z. Hoffman, *LSU Master's Theses. 2269*, 2005, 97.
- 34 S. Pourjazaieri, M. Zoveidavianpoor and S. R. Shadizadeh, *Pet. Sci. Technol.*, 2011, **29**, 39–47.
- 35 S. Kim, D. Ko, J. Mun, T. hyun Kim and J. Kim, *Korean J. Chem. Eng.*, 2018, **35**, 941–955.
- 36 S. Kim, M. Kim, Y. T. Kim, G. Kwak and J. Kim, *Energy Convers. Manag.*, 2019, **182**, 240–250.
- 37 A. A. Kiss, J. J. Pragt, H. J. Vos, G. Bargeman and M. T. de Groot, *Chem. Eng. J.*, 2016, **284**, 260–269.
- 38 R. K. Sinnott and G. Towler, *Chemical Engineering Design*, 2013.
- 39 G. Glenk and S. Reichelstein, *Nat. Energy*, 2019, **4**, 216–222.
- 40 Y. Khojasteh Salkuyeh, B. A. Saville and H. L. MacLean, *Int. J. Hydrogen Energy*, 2017, **42**, 18894–18909.
- 41 W. L. Luyben, *Comput. Chem. Eng.*, 2017, **103**, 144–150.
- 42 M. Jouny, W. Luc and F. Jiao, *Ind. Eng. Chem. Res.*, 2018, **57**, 2165–2177.
- 43 M. Yang and F. You, *Ind. Eng. Chem. Res.*, 2017, **56**, 4038–4051.
- 44 Gas prices Explained, No Title.
- 45 IRENA, Biodiesel, <https://www.irena.org/costs/Transportation/Biodiesel>, (accessed 1 February 2020).
- 46 Trading economic: Naphtha, <https://tradingeconomics.com/commodity/naphtha>, (accessed 2 February 2020).
- 47 A. M. Brander, A. Sood, C. Wylie, A. Haughton, J. Lovell, I. Reviewers and G. Davis, *Econometrica*, 2011, 1–22.
- 48 Defra, *Defra*, 2015.



- 49 City of Winnipeg, *WSTP South End Plant Process Sel. Rep.*, , DOI:10.1016/B978-1-4160-4044-6.50105-9.
- 50 International Energy Agency, *Iea*, 2017, **40**, 590–615.
- 51 Union of Concerned Scientists, Each Country’s Share of CO2 Emissions, <https://www.ucsusa.org/resources/each-countrys-share-co2-emissions>, (accessed 3 May 2020).
- 52 EIA, Henry Hub Natural Gas Spot Price, <https://www.eia.gov/dnav/ng/hist/rngwhhdm.htm>, (accessed 5 September 2020).
- 53 YCharts, European Union Natural Gas Import Price, <https://cutt.ly/MbHp4AA>, (accessed 5 September 2020).
- 54 International Gas Union, *Wholesale gas price survey - 2019 edition: A global review of price formation mechanisms*, Barcelona, Spain, 2019.
- 55 IRENA, *Renewable Power Generation Costs in 2017*, Abu Dhabi, 2019.
- 56 IRENA, *Future of wind: Deployment, investment, technology, grid integration and socio-economic aspects (A Global Energy Transformation paper)*, International Renewable Energy Agency, Abu Dhabi, 2019.
- 57 IRENA, *Future of Solar Photovoltaic: Deployment, investment, technology, grid integration and socio-economic aspects*, International Renewable Energy Agency, Abu Dhabi, 2019.
- 58 S. Bourne, *The Future of Hydrogen: Seizing today’s opportunities*, 2019.
- 59 IEA (2020), *World Energy Model, IEA, Paris* <https://www.iea.org/reports/world-energy-model>, Paris.
- 60 Renewable Energy Institute, Statistics: RE, <https://www.renewable-ei.org/en/statistics/re/>, (accessed 9 April 2020).
- 61 Y. Khojasteh Salkuyeh, B. A. Saville and H. L. MacLean, *Int. J. Hydrogen Energy*, 2017, **42**, 18894–18909.
- 62 Knoema, Natural gas price forecast: 2020, 2021 and long term to 2030, <https://knoema.com/ncszerf/natural-gas-price-forecast-2020-2021-and-long-term-to-2030>.
- 63 IEA, Evolution of natural gas spot market prices, 2014-2019, Paris, <https://www.iea.org/data-and-statistics/charts/evolution-of-natural-gas-spot-market-prices-2014-2019>, (accessed 4 March 2020).
